1 **Title:** Secondary bile acid ursodeoxycholic acid (UDCA) alters weight, the gut  
2 microbiota, and the bile acid pool in conventional mice

3 **Authors:** Jenessa A. Winston<sup>1,a</sup>, Alissa Rivera<sup>1</sup>, Jingwei Cai<sup>2,b</sup>, Andrew D. Patterson<sup>2</sup>,  
4 and Casey M. Theriot<sup>1,\*</sup>

5 **Affiliations:** <sup>1</sup>Department of Population Health and Pathobiology, College of Veterinary  
6 Medicine, North Carolina State University, 1060 William Moore Drive, Raleigh, NC  
7 27607; <sup>2</sup>Department of Veterinary and Biomedical Sciences, The Pennsylvania State  
8 University, University Park, PA, 16802, USA.

9 Current position: <sup>a</sup>College of Veterinary Medicine Department of Veterinary Clinical  
10 Sciences, The Ohio State University, Columbus, OH 43210; <sup>b</sup> Department of Drug  
11 Metabolism and Pharmacokinetics, Genentech Inc., South San Francisco, CA, 94080,  
12 USA

13

14 **Journal:** *Gut Microbes*

15 **\*Corresponding author information:**

16 Casey M. Theriot

17 Department of Population Health and Pathobiology

18 College of Veterinary Medicine

19 Research Building 406

20 North Carolina State University

21 1060 William Moore Drive

22 Raleigh NC 27607

23 cmtherio@ncsu.edu

## 24 **Abstract**

25 Ursodeoxycholic acid (commercially available as Ursodiol) is a naturally occurring bile  
26 acid that is used to treat a variety of hepatic and gastrointestinal diseases. Ursodiol can  
27 modulate bile acid pools, which have the potential to alter the gut microbiota community  
28 structure. In turn, the gut microbial community can modulate bile acid pools, thus  
29 highlighting the interconnectedness of the gut microbiota-bile acid-host axis. Despite  
30 these interactions, it remains unclear if and how exogenously administered ursodiol  
31 shapes the gut microbial community structure and bile acid pool. This study aims to  
32 characterize how ursodiol alters the gastrointestinal ecosystem in conventional mice.  
33 C57BL/6J wildtype mice were given one of three doses of ursodiol (50, 150, or 450  
34 mg/kg/day) by oral gavage for 21 days. Alterations in the gut microbiota and bile acids  
35 were examined including stool, ileal, and cecal content. Bile acids were also measured  
36 in serum. Significant weight loss was seen in mice treated with the low and high dose of  
37 ursodiol. Alterations in the microbial community structure and bile acid pool were seen  
38 in ileal and cecal content compared to pretreatment, and longitudinally in feces following  
39 the 21-day ursodiol treatment. In both ileal and cecal content, members of the  
40 Lachnospiraceae family significantly contributed to the changes observed. This study is  
41 the first to provide a comprehensive view of how exogenously administered ursodiol  
42 shapes the gastrointestinal ecosystem. Further studies to investigate how these  
43 changes in turn modify the host physiologic response are important.

## 44 **Importance**

45 Ursodeoxycholic acid (commercially available as ursodiol) is used to treat a variety of  
46 hepatic and gastrointestinal diseases. Despite its widespread use, how ursodiol impacts

47 the gut microbial community structure and bile acid pool remains unknown. This study is  
48 the first to provide a comprehensive view of how exogenously administered ursodiol  
49 shapes the gastrointestinal ecosystem. Ursodiol administration in conventional mice  
50 resulted in significant alterations in the gut microbial community structure and bile acid  
51 pool, indicating that ursodiol has direct impacts on the gut microbiota-bile acid-host axis  
52 which should be considered when this medication is administered.

### 53 **Bile Acid Abbreviations**

54  $\alpha$ MCA –  $\alpha$ -Muricholic acid;  $\beta$ MCA – $\beta$ -Muricholic acid;  $\omega$ MCA – $\omega$ -Muricholic acid; CA –  
55 Cholic acid; CDCA – Chenodeoxycholic acid; DCA – Deoxycholic acid; GCDCA –  
56 Glycochenodeoxycholic acid; GDCA – Glycodeoxycholic acid; GLCA – Glycolithocholic  
57 acid; GUDCA – Glycoursodeoxycholic acid; HCA – Hyodeoxycholic acid; iDCA –  
58 Isodeoxycholic acid; iLCA – Isolithocholic acid; LCA – Lithocholic acid; TCA –  
59 Taurocholic acid; TCDCA – Taurochenodeoxycholic acid; TDCA – Taurodeoxycholic  
60 acid; THCA – Taurohyodeoxycholic acid; TUDCA – Tauroursodeoxycholic acid; T $\beta$ MCA  
61 – Tauro- $\beta$ -muricholic acid; T $\omega$ MCA –Tauro  $\omega$ -muricholic acid; UDCA – Ursodeoxycholic  
62 acid.

## 63 **Introduction**

64 Bile acids are produced by host hepatocytes from cholesterol and are released into the  
65 gastrointestinal tract where they aid in the emulsification and absorption of dietary fat.  
66 Once host derived primary bile acids, namely cholic acid (CA) and chenodeoxycholic  
67 acid (CDCA) in humans, enter into the gastrointestinal tract the indigenous gut  
68 microbiota transforms them into secondary bile acids.<sup>1,2</sup> Over 50 chemically distinct  
69 microbial derived secondary bile acids have been identified.<sup>2</sup> Both primary and  
70 secondary bile acids can act as signaling molecules, exerting their effects by activating  
71 bile acid activated receptors, including G-protein coupled bile acid receptor 5 (TGR5)  
72 and the farnesoid X receptor (FXR).<sup>3-5</sup> Examination of the gut microbiota-bile acid-host  
73 axis is growing in diverse fields including gastroenterology, endocrinology, oncology,  
74 immunology, and infectious disease.<sup>1,3-13</sup>

75 Ursodeoxycholic acid (UDCA) is a bile acid that has been medicinally utilized for  
76 over 2500 years.<sup>14</sup> In humans, UDCA is considered a secondary bile acid derived from  
77 microbial conversion of the primary bile acid CDCA into lithocholic acid (LCA) and then  
78 into UDCA.<sup>15</sup> However in other species, including mice, UDCA is a considered a host  
79 derived primary bile acid.<sup>16-18</sup> The Food and Drug Administration (FDA) approved  
80 formulation of UDCA, or ursodiol, is used to treat a variety of diseases including:  
81 cholesterol gallstones, primary biliary cirrhosis, primary sclerosing cholangitis, non-  
82 alcoholic fatty liver disease, chronic viral hepatitis C, recurrent colonic adenomas,  
83 cholestasis of pregnancy, and recurrent pancreatitis.<sup>6,19-27</sup> Ursodiol has vast beneficial  
84 effects (antichloestatic, antifibrotic, antiproliferative, and anti-inflammatory) but the major  
85 effect on bile acid physiology is an increase in hydrophilic bile acid pool by diluting the

86 concentration of the hydrophobic toxic secondary bile acids, deoxycholic acid (DCA)  
87 and LCA.<sup>6,28</sup>

88 In healthy humans administered ursodiol (15 mg/kg/day) for 3 weeks, biliary and  
89 duodenal bile acid concentrations of UDCA and its conjugates (glycoursodeoxycholic  
90 acid, GUDCA and tauroursodeoxycholic acid, TUDCA) increased by 40% compared to  
91 baseline.<sup>29</sup> A decrease in primary bile acids (CA and CDCA) and their glycine and  
92 taurine conjugates, as well as a decrease in the secondary bile acid DCA and its  
93 conjugates (glycodeoxycholic acid, GDCA and taurodeoxycholic acid, TDCA) was  
94 observed within biliary and duodenal bile.<sup>29</sup> An increase in conjugates of the secondary  
95 bile acid LCA (glycolithocholic acid, GLCA and tauroolithocholic acid, TLCA) were  
96 observed after UDCA treatment within biliary and duodenal bile samples.<sup>29</sup> Ursodiol can  
97 alter liver and biliary bile acid pools, but gastrointestinal contents and feces have not  
98 been well studied, thus limiting our understanding of how ursodiol shapes the microbial  
99 niche and bile acid profiles within the gastrointestinal ecosystem.

100 Evidence is mounting that bile acids, through TGR5 and FXR signaling, are  
101 capable of altering the host physiologic response (recently reviewed in Wahlstrom et al.<sup>3</sup>  
102 and Fiorucci et al.<sup>4</sup>). Bile acids can also directly and indirectly, through activation of the  
103 innate immune response, alter the gut microbial composition.<sup>3,4</sup> Together, highlighting  
104 the interconnectedness and complexity of the gut microbiota-bile acid-host axis, and  
105 emphasizing the fact that exogenously administered bile acids will likely modulate this  
106 axis. Our rudimentary knowledge of how ursodiol modulates the gut microbial  
107 community structure, bile acid pool, and host physiology warrants further

108 characterization to better understand the complex role of bile acids within the  
109 gastrointestinal ecosystem.

110 This study aims to define how ursodiol alters the gastrointestinal ecosystem in  
111 conventional mice. Mice were administered three different doses of ursodiol (50, 150,  
112 450 mg/kg) via daily oral gavage for 21 days. The gut microbial community structure  
113 and bile acid pool were evaluated. Samples were obtained longitudinally in fecal  
114 samples and ileal and cecal content were collected pretreatment and after 21 days of  
115 ursodiol. Serum bile acid profiles were also evaluated after 21 days of ursodiol  
116 treatment. Collectively, ursodiol treatment resulted in biographically distinct alterations  
117 within the indigenous gut microbiota and bile acid metabolome in conventional mice.  
118 These findings support that ursodiol administration impacts the indigenous  
119 gastrointestinal ecosystem and thus modulates the gut microbiota-bile acid-host axis.

## 120 **Materials and Methods**

### 121 **Ethical statement.**

122 The Institutional Animal Care and Use Committee (IACUC) at North Carolina State  
123 University College of Veterinary Medicine (NCSU) approved this study. The NCSU  
124 Animal Care and Use policy applies standards and guidelines set forth in the Animal  
125 Welfare Act and Health Research Extension Act of 1985. Laboratory animal facilities at  
126 NCSU adhere to guidelines set forth in the Guide for the Care and Use of Laboratory  
127 Animals. The animals' health statuses were assessed daily, and moribund animals were  
128 humanely euthanized by CO<sub>2</sub> asphyxiation followed by secondary measures (cervical  
129 dislocation). Trained animal technicians or a veterinarian performed animal husbandry  
130 in an AAALAC-accredited facility during this study.

131 **Animals and housing.**

132 C57BL/6J wildtype mice (females and males) were purchased from Jackson  
133 Laboratories (Bar Harbor, ME) and quarantined for 1 week prior to starting the Ursodiol  
134 administration to adapt to the new facilities and avoid stress-associated responses.  
135 Following quarantine, the mice were housed with autoclaved food, bedding, and water.  
136 Cage changes were performed weekly by laboratory staff in a laminar flow hood. Mice  
137 had a 12 hr cycle of light and darkness.

138 **Ursodiol dosing experiment and sample collection.**

139 Groups of 5 week old C57BL/6J WT mice (male and female) were treated with Ursodiol  
140 at three distinct doses (50, 150, and 450 mg/kg dissolved in corn oil; Ursodiol U.S.P.,  
141 Spectrum Chemical, CAS 128-13-2) given daily via oral gavage for 21 days (Figure 1).  
142 Ursodiol dosing was adjusted once weekly, based on current weight. Two independent  
143 experiments were performed, with a total of n=8 mice (female/male) per treatment  
144 group. Mice were weighed daily over the course of the experiment. Fecal pellets were  
145 collected twice daily, flash-frozen and stored at -80°C until further analysis. A control  
146 group of mice were necropsied prior to initiating any treatments (*pretreatment* group).  
147 Necropsy was performed at day 21 in all Ursodiol treated mice. Gastrointestinal  
148 contents and tissue from the ileum and cecum were collected, flash frozen in liquid  
149 nitrogen, and stored at -80°C until further analysis. Serum and bile aspirated from the  
150 gallbladder was obtained flash frozen in liquid nitrogen, and stored at -80°C until further  
151 analysis.

152 On several occasions, mice had evidence of corn oil within the oral cavity or on their  
153 muzzles immediately after the gavage. These mice were monitored closely for signs of

154 aspiration pneumonia for 36 hr following this event. Two mice, one from the Ursodiol 50  
155 mg/kg group and another from the Ursodiol 450 mg/kg group, inadvertently aspirated  
156 gaviged Ursodiol, containing corn oil, and subsequently developed respiratory distress  
157 within 12-24 hr following the aspiration event. The clinical signs were most consistent  
158 with lipid induced pneumonitis and both mice were humanely euthanized and excluded  
159 from the study.

#### 160 **Targeted metabolomics of murine bile acid by UPLC-MS/MS.**

161 Targeted analysis of bile acids in ileal and cecal content, fecal pellets, serum, and bile  
162 were performed with an ACQUITY ultraperformance liquid-chromatography (UPLC)  
163 system using a C8 BEH column (2.1 × 100 mm, 1.7 μm) coupled with a Xevo TQ-S  
164 triplequadrupole mass spectrometer equipped with an electrospray ionization (ESI)  
165 source operating in negative ionization mode (All Waters, Milford, MA) as previously  
166 described.<sup>30</sup> The sample was thawed on ice and 25 mg was added to 1 mL of pre-  
167 cooled methanol containing 0.5 μM stable-isotope-labeled bile acids as internal  
168 standards (IS), followed by homogenization (1.0-mm-diameter zirconia/silica beads  
169 added) and centrifugation. Supernatant (200 μl) was transferred to an autosampler vial.  
170 20 μL of serum was extracted by adding 200 μL pre-cooled methanol containing 0.5 μM  
171 IS. 5 μL of gall bladder bile was extracted with 500 μL pre-cooled methanol containing  
172 0.5 μM IS. Following centrifugation, the supernatant of the extract was transferred to an  
173 autosampler vial for quantitation. Following centrifugation, the supernatant of the extract  
174 was transferred to an autosampler vial for quantitation. Bile acids were detected by  
175 either multiple reaction monitoring (MRM) (for conjugated bile acid) or selected ion  
176 monitoring (SIM) (for non-conjugated bile acid). MS methods were developed by



177 infusing individual bile acid standards. Calibration curves were used to quantify the  
178 biological concentration of bile acids. Bile acid quantitation was performed in the  
179 laboratory of Dr. Andrew Patterson at Penn State University.

180 Random Forest analysis was performed in MetaboAnalyst 3.0  
181 (<http://www.metaboanalyst.ca/faces/ModuleView.xhtml>).<sup>31</sup> Briefly, the data were  
182 uploaded in the Statistical Analysis module with default settings and no further data  
183 filtering. Random Forest analysis Ward clustering algorithm and Euclidean distance  
184 were used to identify top bile acids within Ursodiol treatment groups. Heatmaps and box  
185 and whisker plots of bile acid concentrations, and nonmetric multidimensional scaling  
186 (NMDS) depicting the dissimilarity indices via Horn distances between bile acid profiles  
187 were generated using R packages (<http://www.R-project.org>).

#### 188 **Illumina MiSeq sequencing of bacterial communities.**

189 Microbial DNA was extracted from murine fecal pellets and ileal and cecal tissue snips  
190 that also included luminal content using the PowerSoil-htp 96-well soil DNA isolation kit  
191 (Mo Bio Laboratories, Inc.). The V4 region of the 16S rRNA gene was amplified from  
192 each sample using a dual-indexing sequencing strategy.<sup>32</sup> Each 20  $\mu$ l PCR mixture  
193 contained 2  $\mu$ l of 10 $\times$  Accuprime PCR buffer II (Life Technologies), 0.15  $\mu$ l of Accuprime  
194 high-fidelity Taq (catalog no. 12346094) high-fidelity DNA polymerase (Life  
195 Technologies), 2  $\mu$ l of a 4.0  $\mu$ M primer set, 1  $\mu$ l DNA, and 11.85  $\mu$ l sterile double-  
196 distilled water (ddH<sub>2</sub>O) (free of DNA, RNase, and DNase contamination). The template  
197 DNA concentration was 1 to 10 ng/ $\mu$ l for a high bacterial DNA/host DNA ratio. PCR was  
198 performed under the following conditions: 2 min at 95°C, followed by 30 cycles of 95°C  
199 for 20 sec, 55°C for 15 sec, and 72°C for 5 min, followed by 72°C for 10 min. Each 20  $\mu$ l

200 PCR mixture contained 2  $\mu$ l of 10 $\times$  Accuprime PCR buffer II (Life Technologies), 0.15  $\mu$ l  
201 of Accuprime high-fidelity Taq (catalog no. 12346094) high-fidelity DNA polymerase  
202 (Life Technologies), 2  $\mu$ l of 4.0  $\mu$ M primer set, 1  $\mu$ l DNA, and 11.85  $\mu$ l sterile ddH<sub>2</sub>O  
203 (free of DNA, RNase, and DNase contamination). The template DNA concentration was  
204 1 to 10 ng/ $\mu$ l for a high bacterial DNA/host DNA ratio. PCR was performed under the  
205 following conditions: 2 min at 95°C, followed by 20 cycles of 95°C for 20 sec, 60°C for  
206 15 sec, and 72°C for 5 min (with a 0.3°C increase of the 60°C annealing temperature  
207 each cycle), followed by 20 cycles of 95°C for 20 sec, 55°C for 15 sec, and 72°C for 5  
208 min, followed by 72°C for 10 min. Libraries were normalized using a Life Technologies  
209 SequalPrep normalization plate kit (catalog no. A10510-01) following the manufacturer's  
210 protocol. The concentration of the pooled samples was determined using the Kapa  
211 Biosystems library quantification kit for Illumina platforms (KapaBiosystems KK4854).  
212 The sizes of the amplicons in the library were determined using the Agilent Bioanalyzer  
213 high-sensitivity DNA analysis kit (catalog no. 5067-4626). The final library consisted of  
214 equal molar amounts from each of the plates, normalized to the pooled plate at the  
215 lowest concentration.

216 Sequencing was done on the Illumina MiSeq platform, using a MiSeq reagent kit  
217 V2 with 500 cycles (catalog no. MS-102-2003) according to the manufacturer's  
218 instructions, with modifications.<sup>32</sup> Libraries were prepared according to Illumina's  
219 protocol for preparing libraries for sequencing on the MiSeq (part 15039740 Rev. D) for  
220 2 or 4 nM libraries. The final load concentration was 4 pM (but it can be up to 8 pM) with  
221 a 10% PhiX spike to add diversity. Sequencing reagents were prepared according to  
222 Illumina's protocol for 16S sequencing with the Illumina MiSeq personal sequencer.<sup>32</sup>

223 (Updated versions of this protocol can be found at  
224 [http://www.mothur.org/wiki/MiSeq\\_SOP](http://www.mothur.org/wiki/MiSeq_SOP).) Custom read 1, read 2, and index primers  
225 were added to the reagent cartridge, and FASTQ files were generated for paired-end  
226 reads.

## 227 **Microbiome analysis.**

228 Analysis of the V4 region of the 16S rRNA gene was done using mothur (version  
229 1.40.1).<sup>32,33</sup> Briefly, the standard operating procedure (SOP) at  
230 [http://www.mothur.org/wiki/MiSeq\\_SOP](http://www.mothur.org/wiki/MiSeq_SOP) was followed to process the MiSeq data. The  
231 paired-end reads were assembled into contigs and then aligned to the SILVA 16S rRNA  
232 sequence database (release 132)<sup>34,35</sup> and were classified to the mothur-adapted RDP  
233 training set v16<sup>36</sup> using the Wang method and an 80% bootstrap minimum to the family  
234 taxonomic level. All samples with <500 sequences were removed. Chimeric sequences  
235 were removed using UCHIME.<sup>37</sup> Sequences were clustered into operational taxonomic  
236 units (OTU) using a 3% species-level definition. The OTU data were then filtered to  
237 include only those OTU that made up 1% or more of the total sequences. The  
238 percentage of relative abundance of bacterial phyla and family members in each sample  
239 was calculated. A cutoff of 0.03 (97%) was used to define operational taxonomic units  
240 (OTU) and Yue and Clayton dissimilarity metric ( $\theta$ YC) was utilized to assess beta  
241 diversity. In addition to NMDS ordination, principle coordinate analysis (PCoA) biplots  
242 using Spearman correlation were used to examine difference in microbial community  
243 structures between Ursodiol treatments and compared to pretreatment. Standard  
244 packages in R (<http://www.R-project.org>) were used to create NMDS ordination on  
245 serial fecal samples.

246 **Statistical analysis.**

247 Statistical tests were performed using Prism version 7.0b for Mac OS X (GraphPad  
248 Software, La Jolla California USA) or using R packages (<http://www.R-project.org>). To  
249 assess weight loss a two-way ANOVA with Dunnett's multiple comparisons post hoc  
250 test comparing Ursodiol treatment groups and untreated mice was performed. For  
251 microbiome analysis, analysis of molecular variance (AMOVA) was used to detect  
252 significant microbial community clustering of treatment groups in NMDS plots and  
253 principle coordinate analysis (PCoA) biplots using Spearman correlation were used to  
254 examine difference in microbial community structures between Ursodiol treatments and  
255 compared to pretreatment.<sup>38</sup> For bile acid metabolome, a NMDS illustrates dissimilarity  
256 indices via Horn distances between bile acid profiles. To assess the comprehension bile  
257 acid profiles, a two-way ANOVA followed by Dunnett's multiple comparisons post hoc  
258 test was used to compare Ursodiol treatment groups to pretreatment bile acid profiles. A  
259 Kruskal-Wallis one-way ANOVA test followed by Dunn's multiple comparisons test was  
260 used to calculate the significant of individual bile acid within each Ursodiol treatment  
261 group compared to pretreatment. Statistical significance was set at a p value of < 0.05  
262 for all analyses (\*, p < 0.05; \*\*, p < 0.01; \*\*\*, p < 0.001; \*\*\*\*, p < 0.0001).

263 **Results**

264 **Ursodiol treatment results in weight loss.**

265 C57BL/6J conventional mice were administered three different doses of ursodiol (50,  
266 150, 450 mg/kg/day; denoted here on out as Ursodiol 50, Ursodiol 150, and Ursodiol  
267 450 respectively) via oral gavage for 21 days (Figure 1). Mice were monitored and  
268 weighed daily. Mice in the 50 and 450 mg/kg ursodiol treatment groups sustained

269 significant weight loss within a week of administration of Ursodiol compared to untreated  
270 mice (Figure 2A and 2C). For the Ursodiol 50 mg/kg treatment group, this weight loss  
271 persisted over the course of the experiment (Figure 2A). For the ursodiol 450 mg/kg  
272 treatment group, initially weight loss was noted during the first and third week of  
273 Ursodiol administration (Figure 2C). The ursodiol 150 mg/kg treatment group did not  
274 have significantly different weights compared to the untreated mice (Figure 2B). No  
275 other clinical signs were noted during Ursodiol administration. In general, mice tolerated  
276 daily gavage with diminishing stress related to the procedure over the course of the  
277 experiment.

#### 278 **Ursodiol alters the gut microbial community structure in conventional mice.**

279 Paired fecal samples were collected from the same mice serially over the 21-day  
280 experiment to facilitate simultaneous evaluation of the microbial community structure  
281 and bile acid metabolome. Mice were sacrificed at day 21 and gut content from the  
282 ileum and cecum were collected at necropsy, and stored for later analysis. 16S rRNA  
283 gene sequencing was performed to define the gut microbiota.

284         Within the ileum, the gut microbial community structure of the Ursodiol 150 and  
285 Ursodiol 450 treatment groups were significantly different from pretreatment (Figure 3A;  
286 AMOVA;  $p = 0.02$  and  $p = 0.009$ , respectively). Bar plots were utilized to visualize  
287 relative composition of ileal microbial communities, which are different across each  
288 Ursodiol dose and compared to pretreatment (Figure 3C). However, the overall gut  
289 microbial community structure between treatments was not significantly different based  
290 on AMOVA. A biplot of the correlating OTUs towards PCoA axes 1 and 2 revealed OTU  
291 109 (classified as Lachnospiraceae) as the only significant member contributing to ileal

292 microbial community alterations seen with Ursodiol treatment (Figure S1A and Figure  
293 3C).

294 Within the cecum, the gut microbial community structure of the Ursodiol 450  
295 treatment group was significantly different from pretreatment (Figure 3B; AMOVA;  $p =$   
296 0.002). Bar plots were utilized to visualize relative composition of cecal microbial  
297 communities, which were marginally different across each Ursodiol dose and compared  
298 to pretreatment (Figure 3D). In accordance, the overall gut microbial community  
299 structure between treatments was not significantly different based on AMOVA. A biplot  
300 of the top 10 OTUs towards PCoA axes 1 and 2 revealed OTU 86 (classified as  
301 Lachnospiraceae) as a significant member contributing to cecal microbial community  
302 alterations seen with Ursodiol treatment (Figure S1B).

303 Within the feces, the gut microbial community structures of all Ursodiol treatment  
304 groups were significantly different from pretreatment (Figure S1C; AMOVA;  $p = 0.004$ ,  $p$   
305  $<0.001$ ,  $p <0.001$ , respectively). A biplot of the top 10 correlating operational taxonomic  
306 units (OTUs) towards PCoA axes 1 and 2 revealed OTU 24 (classified as  
307 Ruminococcaceae) as a significant member contributing to fecal microbial community  
308 alterations seen with Ursodiol treatment over time and eight opposing OTUs (Figure  
309 S1C).

### 310 **Ursodiol alters the bile acid pool in conventional mice.**

311 To determine the extent that ursodiol alters the bile acid pool, assessment of 47 bile  
312 acids, was conducted on paired ileal, cecal, and fecal samples used in the preceding  
313 microbial community structure evaluation. In addition to NMDS ordination and

314 comprehensive bile acid profile heatmaps, Random Forest analysis was applied to  
315 identify bile acids that are important for distinguishing between ursodiol treatments.

316 Ileal content bile acid profiles revealed segregation of the ursodiol 150 and  
317 ursodiol 450 treatments from pretreatment bile acid profiles (Figure 4A). A total of 35  
318 distinct bile acids were quantified within murine ileal content (Figure 4C). When  
319 assessing the ileal bile acid profile, 3 bile acids, TUDCA, tauro- $\beta$ -muricholic acid  
320 (T $\beta$ MCA), and TCA were significantly different compared to pretreatment using a two-  
321 way ANOVA followed by Dunnett's multiple comparisons post hoc test. For TUDCA, all  
322 three ursodiol treatments were significantly different from pretreatment (all treatments,  $p$   
323 = 0.0001). For T $\beta$ MCA, only the ursodiol 50 treatment was significantly different from  
324 pretreatment ( $p$  = 0.0001). For TCA, all three ursodiol treatments were significantly  
325 different from pretreatment (Ursodiol 50,  $p$  = 0.0002; Ursodiol 150,  $p$  = 0.0040, and  
326 Ursodiol 450,  $p$  = 0.0374). Within the ileal content, the two highest MDA scores from the  
327 Random Forest analysis were UDCA and TUDCA, with high concentrations of both  
328 these bile acids in the ursodiol 450 treatment group (Figure S2A). A Kruskal-Wallis one-  
329 way ANOVA test followed by Dunn's multiple comparisons test was used to calculate  
330 the significance of an individual bile acid within each Ursodiol treatment group  
331 compared to pretreatment. For ileal content, UDCA, TUDCA, GUDCA, and LCA were  
332 significantly higher in ursodiol 450 treatment compared to pretreatment ( $p$  = 0.0007,  $p$  =  
333 0.0013,  $p$  = 0.0022, and  $p$  = 0.0218, respectively; Figure S3A).

334 Cecal content bile acid profiles revealed segregation of the ursodiol treatments  
335 from pretreatment bile acid profiles (Figure 4B). A total of 38 distinct bile acids were  
336 quantified within murine cecal content (Figure 4D). When assessing the cecal bile acid

337 profile, 2 bile acids, TUDCA and T $\beta$ MCA were significantly different compared to  
338 pretreatment using a two-way ANOVA followed by Dunnett's multiple comparisons post  
339 hoc test. For TUDCA, Ursodiol 50 and 450 treatment groups were significantly different  
340 from pretreatment (both treatments,  $p = 0.0001$ ). For T $\beta$ MCA, only the Ursodiol 50  
341 treatment was significantly different from pretreatment ( $p = 0.0219$ ). The two highest  
342 MDA scores from the Random Forest analysis were TCDCA and TUDCA, with high  
343 concentrations of both these bile acids in the Ursodiol 450 treatment group (Figure  
344 S2B). A Kruskal-Wallis one-way ANOVA test followed by Dunn's multiple comparisons  
345 test was used to calculate the significance of an individual bile acid within each Ursodiol  
346 treatment group compared to pretreatment. For cecal content, LCA, 3-ketocholanic acid,  
347 and  $\alpha$ -muricholic acid ( $\alpha$ MCA) were significantly higher in the Ursodiol 150 treatment  
348 compared to pretreatment ( $p = 0.0143$ ,  $p = 0.0255$ ; and  $p = 0.0280$ , respectively;  
349 Figures S3B). UDCA, TUDCA, GUDCA, T $\beta$ MCA, and MCA were significantly higher in  
350 the Ursodiol 450 treatment compared to pretreatment ( $p = 0.0307$ ,  $p = 0.0047$ ,  $p =$   
351  $0.0160$ ,  $p = 0.0352$ , and  $p = 0.0321$ , respectively; Figures S3B).

352 Serial fecal bile acid profiles revealed distinct segregation of the ursodiol  
353 treatments from each other and from pretreatment bile acid profiles (Figure 5A). A total  
354 of 38 distinct bile acids were quantified within murine feces (Figure 5B). When  
355 assessing fecal bile acid profiles, 4 bile acids, UDCA, TUDCA, MCA, and T $\beta$ MCA were  
356 significantly different compared to pretreatment using a two-way ANOVA followed by  
357 Dunnett's multiple comparisons post hoc test performed at each sampling day (Day 5,  
358 8, 10, 12, and 15). Within the Ursodiol 50 treatment group, UDCA and TUDCA were  
359 significantly different from pretreatment only at Day 8 ( $p = 0.0296$  and  $p = 0.0001$ ,



360 respectively). Within the Ursodiol 150 treatment group, UDCA and TUDCA were  
361 significantly different from pretreatment only at Day 15 ( $p = 0.0001$  and  $p = 0.0107$ ,  
362 respectively). Within the Ursodiol 450 treatment group, UDCA was significantly different  
363 from pretreatment at Days 5 ( $p = 0.0020$ ), 8 ( $p = 0.0007$ ), 10 ( $p = 0.0044$ ), and 15 ( $p =$   
364  $0.0001$ ). TUDCA was also significantly different from pretreatment in the Ursodiol 450  
365 group at all sampling days ( $p = 0.0001$  for all days). Additionally, MCA and T $\beta$ MCA in  
366 the Ursodiol 450 treatment group on Day 15 were significantly different from  
367 pretreatment ( $p = 0.0001$  for both).

368 Within serum, aside from a single ursodiol 50 treatment serum sample, the  
369 ursodiol treatments segregated distinctly from the pretreatment samples with Ursodiol  
370 treatments clustering together at day 21 (Figure S4A). A total of 35 distinct bile acids  
371 were quantified within murine serum samples (Figure S4B). The two highest MDA  
372 scores from the Random Forest analysis were TUDCA and UDCA, with high  
373 concentrations of both these bile acids in the Ursodiol 450 treatment group (Figure  
374 S4C). A Kruskal-Wallis one-way ANOVA test followed by Dunn's multiple comparisons  
375 test was used to calculate the significance of an individual bile acid within each Ursodiol  
376 treatment group compared to pretreatment. UDCA, TUDCA, GUDCA, and LCA were  
377 significantly higher in Ursodiol 450 treatment compared to pretreatment ( $p = 0.0008$ ,  $p =$   
378  $0.0007$ ,  $p = 0.0230$ , and  $p = 0.0065$ , respectively; Figure S4D).

## 379 **Discussion**

380 This study is the first to provide a comprehensive examination of how exogenously  
381 administered ursodiol shapes the gastrointestinal ecosystem in conventional mice. By  
382 evaluating the gut microbial community structure and bile acid pool throughout the

383 gastrointestinal tract and in feces, we obtained a biogeographical view of ursodiol  
384 mediated ecological impact. Our findings indicate distinct ursodiol mediated alterations  
385 in the ileum, cecum, and feces likely attributed to biogeographical differences in the  
386 intestinal physiology and microbial ecology in each region.<sup>39</sup>

387 Dose dependent ursodiol mediated alterations in the gut microbial community  
388 structures were observed in the ileum and cecum (Figure 3). In both the ileum and  
389 cecum, members of the Lachnospiraceae family (phylum Firmicutes, Class Clostridia)  
390 significantly contributed to the observed alterations (Figure S1). Lachnospiraceae are  
391 Gram-positive obligate anaerobes, which are highly abundant in the digestive tracts of  
392 many mammals, including humans and mice.<sup>40,41</sup> Members of the Lachnospiraceae  
393 have been linked to obesity<sup>42-44</sup> and may provide protection from colon cancer,<sup>45,46</sup>  
394 mainly due to their association with butyric acid production<sup>47</sup>, which is essential for  
395 microbial and host cell growth.<sup>40</sup> Additionally, monocolonization of germfree mice with a  
396 Lachnospiraceae isolate resulted in greatly improved clinical outcomes and partial  
397 restoration of colonization resistance against the enteric pathogen *Clostridioides*  
398 *difficile*.<sup>48</sup> Collectively, emphasizing the varied disease states where members of the  
399 Lachnospiraceae family are important and demonstrating potential applications of  
400 Ursodiol mediated Lachnospiraceae expansion to precisely modulate microbial  
401 mediated disease states.

402 Ursodiol administration resulted in global increases of several key bile acid  
403 species, namely UDCA, TUDCA, GUDCA, LCA, TCA, and T $\beta$ MCA. Each of these bile  
404 acids can interact with bile acid activated receptors, including G-protein coupled bile  
405 acid receptor 5 (TGR5) and the farnesoid X receptor (FXR), and thus are able to

406 regulate and alter host physiologic responses.<sup>3-5</sup> Activation of either bile acid receptor  
407 has distinct physiologic consequences. For example, FXR regulates bile acid, glucose,  
408 and lipid homeostasis, and insulin signaling and immune responses.<sup>3,4</sup> TGR5 regulates  
409 energy homeostasis, thermogenesis, insulin signaling, and inflammation.<sup>3,4</sup> In terms of  
410 innate immune regulation, the overall response of FXR and TGR5 activation is  
411 maintenance of a tolerogenic phenotype within the intestine and liver (recently reviewed  
412 in Fiorucci *et al.*).<sup>4</sup> Each bile acid species differ in their agonistic or antagonistic effects  
413 and affinity for FXR and TGR5 (see Table 1). This intensifies the complexity of  
414 unraveling the cumulative host physiologic responses resulting from ursodiol mediated  
415 bile acid metabolome alterations.

416         Additionally, bile acid species can directly and indirectly, through activation of the  
417 innate immune response, alter the gut microbial composition.<sup>3,4</sup> Further adding to the  
418 interconnectedness and complexity of the gut microbiota-bile acid-host axis. Evaluation  
419 of the host intestinal transcriptome may elucidate local Ursodiol mediated impacts on  
420 host physiology and complete our examination of the gut microbiota-bile acid-host axis.  
421 Acquisition of such data, in combination with the comprehensive microbiome and bile  
422 acid metabolome data obtained in this study, could be integrated using bioinformatics  
423 and mathematical modeling to further illustrate these intricate interactions between the  
424 gut microbiota, bile acids, and the host in an Ursodiol altered intestinal ecosystem.

425         During ursodiol administration significant weight loss was noted in the ursodiol 50  
426 and Ursodiol 450 treatments compared to untreated mice (Figure 2). We speculate that  
427 weight loss was attributed to bile acid TGR5 activation resulting in alteration to energy  
428 metabolism. A similar pathophysiology of weight loss attributed to bile acid activation of

429 TGR5 is documented in patients following bariatric surgery.<sup>49</sup> Circulating bile acids can  
430 activate TGR5 receptors within enteroendocrine cells, skeletal muscle, and brown  
431 adipose tissue.<sup>50</sup> Aside from TGR5 mediated glucagon-like peptide-1 (GLP-1) release,  
432 which can improve glycemic control by increasing insulin secretion and sensitivity,<sup>51</sup>  
433 TGR5 can facilitate weight loss by increasing resting energy expenditure by promoting  
434 conversion of inactive thyroxine (T4) into active thyroid hormone (T3).<sup>52</sup> In our study,  
435 global large-scale increases in TUDCA, a TGR5 receptor agonist,<sup>53</sup> were observed and  
436 may explain why weight loss occurred in our ursodiol treated mice. It is unclear why  
437 weight loss was not observed in the ursodiol 150 treatment group. Further investigation  
438 into TGR5 activation and subsequent modulation of energy expenditure with Ursodiol  
439 administration would be of interest.

440 In this study, we reported that daily ursodiol administration in conventional mice  
441 significantly impacts the gastrointestinal ecosystem, with alterations in the microbial  
442 composition and bile acid pool. Such substantial ecology changes are likely to modify  
443 host physiology. Ecological succession after ursodiol discontinuation was not evaluated  
444 in the present study, thus understanding how durable ursodiol mediated changes are in  
445 the mouse gastrointestinal systems remain unclear. Therefore, although ursodiol is  
446 generally well tolerated and safe to administer for various hepatic diseases,<sup>6,19-27</sup> the  
447 long-term consequences of ursodiol mediated gastrointestinal ecologic shifts remains  
448 unknown. Further studies evaluating how exogenously administered bile acids, such as  
449 ursodiol, manipulate the dynamic gut microbiota-bile acid-host axis may elucidate how  
450 to restore health during disease states characterized by bile acid metabolism, including

451 metabolic disease, obesity, IBD, and microbial-mediated colonization resistance against  
452 enteric pathogens such as *C. difficile*.

### 453 **Acknowledgements**

454 JAW was funded by the Ruth L. Kirschstein National Research Service Award Research  
455 Training grant T32OD011130 by NIH. CMT is funded by the National Institute of  
456 General Medical Sciences of the National Institutes of Health under award number  
457 R35GM119438. This project was also funded by an intramural grant from the North  
458 Carolina State University College of Veterinary Medicine.

### 459 **Disclosure statement**

460 CMT is a scientific advisor to Locus Biosciences, a company engaged in the  
461 development of antimicrobial technologies. CMT is a consultant for Vedanta  
462 Biosciences.

463

464

465

466 **Table 1: Bile acid effects on bile acid receptors FXR and TGR5**

| <b>Bile Acid</b> | <b>Farnesoid X Receptor (FXR)</b> | <b>G-protein coupled bile acid receptor 5 (TGR5)</b> |
|------------------|-----------------------------------|------------------------------------------------------|
| <b>UDCA</b>      | Antagonist                        | Agonist                                              |
| <b>TUDCA</b>     | Agonist <sup>54</sup>             | Agonist <sup>53</sup>                                |
| <b>GUDCA</b>     | Antagonist <sup>55</sup>          | Agonist <sup>56</sup>                                |
| <b>LCA</b>       | Agonist                           | Agonist                                              |
| <b>TCA</b>       | Agonist                           | Results in GLP-1 release <sup>57</sup>               |
| <b>TβMCA</b>     | Antagonist                        | -                                                    |

467 *Table adapted from Wahlstrom et al., 2016<sup>3</sup> and Fiorucci et al., 2018<sup>4</sup> manuscripts*

468

469

470

471 **Figure legends**

472 **Figure 1: Mouse experimental design.** Groups of 5-week old C57BL/6J WT mice  
473 were treated with Ursodiol at three distinct doses (50, 150, and 450 mg/kg) given daily  
474 via oral gavage for 21 days. Fecal collection was performed twice daily throughout the  
475 experiment. Two independent experiments were performed, with a total of  $n = 8$  (4  
476 females/4males) mice per treatment group. Mice were monitored and weighed daily  
477 throughout the experiment. A control group of mice were necropsied prior to initiating  
478 any treatments (pretreatment group). Necropsy was performed at day 21 for all Ursodiol  
479 treated mice (open circles).

480 **Figure 2: Weight loss observed with daily Ursodiol administration. (A)** Weight loss  
481 in Ursodiol 50 mg/kg, **(B)** Ursodiol 150 mg/kg, and **(C)** Ursodiol 450 mg/kg treatment  
482 group compared to untreated mice. Statistical significance between Ursodiol treatment  
483 groups and untreated mice was determined by a two-way ANOVA with Dunnett's  
484 multiple comparisons post hoc test. Shaded regions represent the standard deviations  
485 from the mean. For all graphs (\*,  $p \leq 0.05$ ; \*\*,  $p \leq 0.01$ ; \*\*\*,  $p \leq 0.001$ ; \*\*\*\*,  $p \leq 0.0001$ ).  
486 Data represents two independent experiments.

487 **Figure 3: Alterations to the indigenous ileal and cecal microbiota associated with**  
488 **Ursodiol administration in conventional mice.** NMDS ordination was calculated from  
489 Yue and Clayton dissimilarity metric ( $\theta_{YC}$ ) on OTU at a 97% cutoff of **(A)** ileal and **(B)**  
490 cecal samples from pretreatment and Ursodiol treated mice. Statistical significance  
491 between Ursodiol treatment groups and pretreatment mice was determined by AMOVA.  
492 The composition of the **(C)** ileal and **(D)** cecal microbiota was visualized with bar plots of  
493 the family relative abundance for each treatment group ( $n=3$  mice per treatment).

494 **Figure 4: Alterations to the ileal and cecal bile acid metabolome associated with**  
495 **Ursodiol administration in conventional mice.** NMDS ordination illustrates  
496 dissimilarity indices via Horn distances between bile acid profiles of paired **(A)** ileal and  
497 **(B)** cecal samples from pretreatment and Ursodiol treated mice. Statistical significance  
498 between Ursodiol treatment groups and pretreatment mice was determined by AMOVA.  
499 Targeted bile acid metabolomics of murine **(C)** ileal and **(D)** cecal content was  
500 performed by UPLC-MS/MS and identified 35 and 38 distinct bile acids respectively.  
501 Significance determined by a two-way ANOVA followed by Dunnett's multiple  
502 comparisons post hoc test to compare comprehensive bile acid profiles of Ursodiol  
503 treatment groups to pretreatment (\* denotes significance).

504 **Figure 5: Alterations to the fecal bile acid metabolome throughout Ursodiol**  
505 **administration in conventional mice. (A)** NMDS ordination illustrates dissimilarity  
506 indices via Horn distances between bile acid profiles of paired fecal samples. **(B)**  
507 Targeted bile acid metabolomics of murine feces was performed by UPLC-MS/MS and  
508 identified 38 distinct bile acids. Significance determined by a two-way ANOVA followed  
509 by Dunnett's multiple comparisons post hoc test to compare comprehensive bile acid  
510 profiles of Ursodiol treatment groups to pretreatment (\* denotes significance). Data  
511 represents two independent experiments (pretreatment, n = 10; n= 3 per treatment per  
512 sampling day).

513 **Supplemental Figure 1: Lachnospiraceae family members significantly contribute**  
514 **to shifts in the microbial community seen with Ursodiol treatment in conventional**  
515 **mice. (A)** Ileal and **(B)** cecal principal coordinate analysis (PCoA) biplot using a  
516 Spearman correlation for top 10 significant OTUs. **(C)** Longitudinal fecal principal

517 coordinate analysis (PCoA) biplot using a Spearman correlation for top 10 significant  
518 OTUs.

519 **Supplemental Figure 2: Bile acids that can differentiate between Ursodiol**  
520 **treatment groups.** Variable-importance plot of the top 15 bile acids identified by  
521 Random Forest analysis in the **(A)** ileum and **(B)** cecum. The mean accuracy value  
522 decrease (MDA score) is a measure of how much predictive power is lost if the given  
523 bile acid is removed or permuted in the Random Forest algorithm. Therefore, the more  
524 important a bile acid is to classifying samples into a treatment group, the further to the  
525 right the point is on the graph. Bile acid points are color-coded for relative  
526 concentrations of each bile acid within the Ursodiol 450 treatment group (red if their  
527 concentration is high in Ursodiol 450 treatment, gray if they were intermediate, and light  
528 blue if the concentrations were low). Each bile acid name is colored coded based on  
529 bile acid type (purple indicates glycine conjugated, orange indicates taurine conjugated,  
530 teal indicates primary unconjugated, blue indicates secondary unconjugated, and gray  
531 indicates other type of bile acid).

532 **Supplemental Figure 3: Alterations in the ileal and cecal bile acid metabolome**  
533 **associated with Ursodiol administration in conventional mice.** Box and whisker  
534 plots of **(A)** ileal and **(B)** cecal bile acids that were significantly altered in Ursodiol  
535 treated mice compared to pretreatment in any of the sample types evaluated (based on  
536 a Two-way ANOVA with Dunnett's multiple comparisons post hoc test). Data represents  
537 two independent experiments (pretreatment, n = 4; Ursodiol 50, n = 3; Ursodiol 150, n =  
538 4; Ursodiol 450, n= 6).



539 **Supplemental Figure 4: Alterations in the serum bile acid metabolome associated**  
540 **with Ursodiol administration in conventional mice. (A)** NMDS ordination illustrates  
541 dissimilarity indices via Horn distances between bile acid profiles of serum samples. **(B)**  
542 Targeted bile acid metabolomics of murine serum was performed by UPLC-MS/MS and  
543 identified 38 distinct bile acids. **(C)** Variable-importance plot of the top 15 bile acids  
544 identified by Random Forest analysis. Bile acid points are color-coded for relative  
545 concentrations of each bile acid within the Ursodiol 450 treatment group (red if their  
546 concentration is high in Ursodiol 450 treatment, gray if they were intermediate, and light  
547 blue if the concentrations were low). Each bile acid name is colored coded based on  
548 bile acid type (purple indicates glycine conjugated, orange indicates taurine conjugated,  
549 teal indicates primary unconjugated, blue indicates secondary unconjugated, and gray  
550 indicates other type of bile acid). **(D)** Box and whisker plots of bile acids that were  
551 significantly altered in Ursodiol treated mice compared to pretreatment in any of the  
552 sample types evaluated (based on a Two-way ANOVA with Dunnett's multiple  
553 comparisons post hoc test). Data represents two independent experiments  
554 (pretreatment, n = 4; Ursodiol 50, n = 3; Ursodiol 150, n = 4; Ursodiol 450, n= 6).

555

556

557

558

559

560

561

562 **REFERENCES**

- 563
- 564 1. Begley M, Gahan CG, Hill C. The interaction between bacteria and bile. *FEMS*
- 565 *Microbiol Rev* 2005;29:625-651.
- 566 2. Setchell KD, Lawson AM, Tanida N, et al. General methods for the analysis of
- 567 metabolic profiles of bile acids and related compounds in feces. *J Lipid Res*
- 568 1983;24:1085-1100.
- 569 3. Wahlstrom A, Kovatcheva-Datchary P, Stahlman M, et al. Crosstalk between Bile
- 570 Acids and Gut Microbiota and Its Impact on Farnesoid X Receptor Signalling. *Dig Dis*
- 571 2017;35:246-250.
- 572 4. Fiorucci S, Biagioli M, Zampella A, et al. Bile Acids Activated Receptors Regulate
- 573 Innate Immunity. *Front Immunol* 2018;9:1853.
- 574 5. Fiorucci S, Distrutti E. Bile Acid-Activated Receptors, Intestinal Microbiota, and the
- 575 Treatment of Metabolic Disorders. *Trends Mol Med* 2015.
- 576 6. Ridlon JM, Bajaj JS. The human gut sterolbiome: bile acid-microbiome endocrine
- 577 aspects and therapeutics. *Acta Pharmaceutica Sinica B* 2015;5:99-105.
- 578 7. Kuipers F, Bloks VW, Groen AK. Beyond intestinal soap--bile acids in metabolic
- 579 control. *Nat Rev Endocrinol* 2014;10:488-498.
- 580 8. Nie YF, Hu J, Yan XH. Cross-talk between bile acids and intestinal microbiota in host
- 581 metabolism and health. *J Zhejiang Univ Sci B* 2015;16:436-446.
- 582 9. Theriot CM, Young VB. Interactions Between the Gastrointestinal Microbiome and
- 583 *Clostridium difficile*. *Annu Rev Microbiol* 2015;69:445-461.
- 584 10. Duboc H, Rajca S, Rainteau D, et al. Connecting dysbiosis, bile-acid dysmetabolism
- 585 and gut inflammation in inflammatory bowel diseases. *Gut* 2013;62:531-539.

- 586 11. Shen A. A Gut Odyssey: The Impact of the Microbiota on Clostridium difficile Spore  
587 Formation and Germination. *PLoS Pathog* 2015;11:e1005157.
- 588 12. Gu Y, Wang X, Li J, et al. Analyses of gut microbiota and plasma bile acids enable  
589 stratification of patients for antidiabetic treatment. *Nat Commun* 2017;8:1785.
- 590 13. Staley C, Weingarden AR, Khoruts A, et al. Interaction of gut microbiota with bile  
591 acid metabolism and its influence on disease states. *Appl Microbiol Biotechnol*  
592 2017;101:47-64.
- 593 14. Wang DQ, Carey MC. Therapeutic uses of animal biles in traditional Chinese  
594 medicine: an ethnopharmacological, biophysical chemical and medicinal review. *World*  
595 *J Gastroenterol* 2014;20:9952-9975.
- 596 15. Russell DW. The enzymes, regulation, and genetics of bile acid synthesis. *Annu*  
597 *Rev Biochem* 2003;72:137-174.
- 598 16. Hagey LR, Crombie DL, Espinosa E, et al. Ursodeoxycholic acid in the Ursidae:  
599 biliary bile acids of bears, pandas, and related carnivores. *Journal of Lipid Research*  
600 1993;34:1911-1917.
- 601 17. Sayin SI, Wahlstrom A, Felin J, et al. Gut microbiota regulates bile acid metabolism  
602 by reducing the levels of tauro-beta-muricholic acid, a naturally occurring FXR  
603 antagonist. *Cell Metab* 2013;17:225-235.
- 604 18. Zhang Y, Limaye PB, Renaud HJ, et al. Effect of various antibiotics on modulation of  
605 intestinal microbiota and bile acid profile in mice. *Toxicol Appl Pharmacol* 2014;277:138-  
606 145.
- 607 19. Ikegami T, Matsuzaki Y. Ursodeoxycholic acid: Mechanism of action and novel  
608 clinical applications. *Hepatol Res* 2008;38:123-131.

- 609 20. Fischer S, Muller I, Zundt BZ, et al. Ursodeoxycholic acid decreases viscosity and  
610 sedimentable fractions of gallbladder bile in patients with cholesterol gallstones. *Eur J*  
611 *Gastroenterol Hepatol* 2004;16:305-311.
- 612 21. Tsubakio K, Kiriyaama K, Matsushima N, et al. Autoimmune pancreatitis successfully  
613 treated with ursodeoxycholic acid. *Intern Med* 2002;41:1142-1146.
- 614 22. Sinakos E, Marschall HU, Kowdley KV, et al. Bile acid changes after high-dose  
615 ursodeoxycholic acid treatment in primary sclerosing cholangitis: Relation to disease  
616 progression. *Hepatology* 2010;52:197-203.
- 617 23. Poupon RE, Bonnand AM, Queneau PE, et al. Randomized trial of interferon-alpha  
618 plus ursodeoxycholic acid versus interferon plus placebo in patients with chronic  
619 hepatitis C resistant to interferon. *Scand J Gastroenterol* 2000;35:642-649.
- 620 24. Serfaty L, De Leusse A, Rosmorduc O, et al. Ursodeoxycholic acid therapy and the  
621 risk of colorectal adenoma in patients with primary biliary cirrhosis: an observational  
622 study. *Hepatology* 2003;38:203-209.
- 623 25. Carey EJ, Ali AH, Lindor KD. Primary biliary cirrhosis. *Lancet* 2015;386:1565-1575.
- 624 26. Zhang L, Liu XH, Qi HB, et al. Ursodeoxycholic acid and S-adenosylmethionine in  
625 the treatment of intrahepatic cholestasis of pregnancy: a multi-centered randomized  
626 controlled trial. *Eur Rev Med Pharmacol Sci* 2015;19:3770-3776.
- 627 27. Mueller M, Thorell A, Claudel T, et al. Ursodeoxycholic acid exerts farnesoid X  
628 receptor-antagonistic effects on bile acid and lipid metabolism in morbid obesity. *J*  
629 *Hepatol* 2015;62:1398-1404.
- 630 28. Copaci I, Micu L, Iliescu L, et al. New therapeutical indications of ursodeoxycholic  
631 acid. *Rom J Gastroenterol* 2005;14:259-266.

- 632 29. Dilger K, Hohenester S, Winkler-Budenhofer U, et al. Effect of ursodeoxycholic acid  
633 on bile acid profiles and intestinal detoxification machinery in primary biliary cirrhosis  
634 and health. *J Hepatol* 2012;57:133-140.
- 635 30. Sarafian MH, Lewis MR, Pechlivanis A, et al. Bile acid profiling and quantification in  
636 biofluids using ultra-performance liquid chromatography tandem mass spectrometry.  
637 *Anal Chem* 2015;87:9662-9670.
- 638 31. Xia J, Wishart DS. Using MetaboAnalyst 3.0 for Comprehensive Metabolomics Data  
639 Analysis. *Curr Protoc Bioinformatics* 2016;55:14.10.11-14.10.91.
- 640 32. Kozich JJ, Westcott SL, Baxter NT, et al. Development of a dual-index sequencing  
641 strategy and curation pipeline for analyzing amplicon sequence data on the MiSeq  
642 Illumina sequencing platform. *Appl Environ Microbiol* 2013;79:5112-5120.
- 643 33. Schloss PD, Westcott SL, Ryabin T, et al. Introducing mothur: open-source,  
644 platform-independent, community-supported software for describing and comparing  
645 microbial communities. *Appl Environ Microbiol* 2009;75:7537-7541.
- 646 34. Pruesse E, Quast C, Knittel K, et al. SILVA: a comprehensive online resource for  
647 quality checked and aligned ribosomal RNA sequence data compatible with ARB.  
648 *Nucleic Acids Res* 2007;35:7188-7196.
- 649 35. Quast C, Pruesse E, Yilmaz P, et al. The SILVA ribosomal RNA gene database  
650 project: improved data processing and web-based tools. *Nucleic Acids Res*  
651 2013;41:D590-596.
- 652 36. Wang Q, Garrity GM, Tiedje JM, et al. Naive Bayesian classifier for rapid  
653 assignment of rRNA sequences into the new bacterial taxonomy. *Appl Environ Microbiol*  
654 2007;73:5261-5267.

- 655 37. Edgar RC, Haas BJ, Clemente JC, et al. UCHIME improves sensitivity and speed of  
656 chimera detection. *Bioinformatics* 2011;27:2194-2200.
- 657 38. Excoffier L, Smouse PE, Quattro JM. Analysis of molecular variance inferred from  
658 metric distances among DNA haplotypes: application to human mitochondrial DNA  
659 restriction data. *Genetics* 1992;131:479-491.
- 660 39. Donaldson GP, Lee SM, Mazmanian SK. Gut biogeography of the bacterial  
661 microbiota. *Nat Rev Microbiol* 2016;14:20-32.
- 662 40. Meehan CJ, Beiko RG. A phylogenomic view of ecological specialization in the  
663 Lachnospiraceae, a family of digestive tract-associated bacteria. *Genome Biol Evol*  
664 2014;6:703-713.
- 665 41. Duncan SH, Louis P, Flint HJ. Cultivable bacterial diversity from the human colon.  
666 *Lett Appl Microbiol* 2007;44:343-350.
- 667 42. Cho I, Yamanishi S, Cox L, et al. Antibiotics in early life alter the murine colonic  
668 microbiome and adiposity. *Nature* 2012;488:621-626.
- 669 43. Duncan SH, Lobeley G, Holtrop G, et al. Human colonic microbiota associated with  
670 diet, obesity and weight loss. 2008;32:1720.
- 671 44. Turnbaugh PJ, Hamady M, Yatsunencko T, et al. A core gut microbiome in obese  
672 and lean twins. *Nature* 2009;457:480-484.
- 673 45. Hague A, Butt AJ, Paraskeva C. The role of butyrate in human colonic epithelial  
674 cells: an energy source or inducer of differentiation and apoptosis? *Proc Nutr Soc*  
675 1996;55:937-943.

- 676 46. Mandal M, Olson DJ, Sharma T, et al. Butyric acid induces apoptosis by up-  
677 regulating Bax expression via stimulation of the c-Jun N-terminal kinase/activation  
678 protein-1 pathway in human colon cancer cells. *Gastroenterology* 2001;120:71-78.
- 679 47. Duncan SH, Barcenilla A, Stewart CS, et al. Acetate utilization and butyryl  
680 coenzyme A (CoA):acetate-CoA transferase in butyrate-producing bacteria from the  
681 human large intestine. *Appl Environ Microbiol* 2002;68:5186-5190.
- 682 48. Reeves AE, Koenigsnecht MJ, Bergin IL, et al. Suppression of *Clostridium difficile*  
683 in the gastrointestinal tracts of germfree mice inoculated with a murine isolate from the  
684 family Lachnospiraceae. *Infect Immun* 2012;80:3786-3794.
- 685 49. Kohli R, Bradley D, Setchell KD, et al. Weight loss induced by Roux-en-Y gastric  
686 bypass but not laparoscopic adjustable gastric banding increases circulating bile acids.  
687 *J Clin Endocrinol Metab* 2013;98:E708-712.
- 688 50. Chen X, Lou G, Meng Z, et al. TGR5: a novel target for weight maintenance and  
689 glucose metabolism. *Exp Diabetes Res* 2011;2011:853501.
- 690 51. D'Alessio DA, Kahn SE, Leusner CR, et al. Glucagon-like peptide 1 enhances  
691 glucose tolerance both by stimulation of insulin release and by increasing insulin-  
692 independent glucose disposal. *J Clin Invest* 1994;93:2263-2266.
- 693 52. Watanabe M, Houten SM, Matakai C, et al. Bile acids induce energy expenditure by  
694 promoting intracellular thyroid hormone activation. *Nature* 2006;439:484-489.
- 695 53. Yanguas-Casas N, Barreda-Manso MA, Nieto-Sampedro M, et al. TUDCA: An  
696 Agonist of the Bile Acid Receptor GPBAR1/TGR5 With Anti-Inflammatory Effects in  
697 Microglial Cells. *J Cell Physiol* 2017;232:2231-2245.

- 698 54. Lee YY, Hong SH, Lee YJ, et al. Tauroursodeoxycholate (TUDCA), chemical  
699 chaperone, enhances function of islets by reducing ER stress. *Biochem Biophys Res*  
700 *Commun* 2010;397:735-739.
- 701 55. Sun L, Xie C, Wang G, et al. Gut microbiota and intestinal FXR mediate the clinical  
702 benefits of metformin. *Nat Med* 2018;24:1919-1929.
- 703 56. Ibrahim E, Diakonov I, Arunthavarajah D, et al. Bile acids and their respective  
704 conjugates elicit different responses in neonatal cardiomyocytes: role of Gi protein,  
705 muscarinic receptors and TGR5. *Sci Rep* 2018;8:7110.
- 706 57. Wu T, Bound MJ, Standfield SD, et al. Effects of taurocholic acid on glycemic,  
707 glucagon-like peptide-1, and insulin responses to small intestinal glucose infusion in  
708 healthy humans. *J Clin Endocrinol Metab* 2013;98:E718-722.
- 709



**Ursodiol (50, 150, 450 mg/kg/day)**

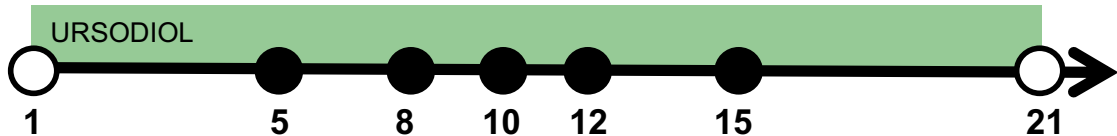

 **Necropsy**

Figure 1

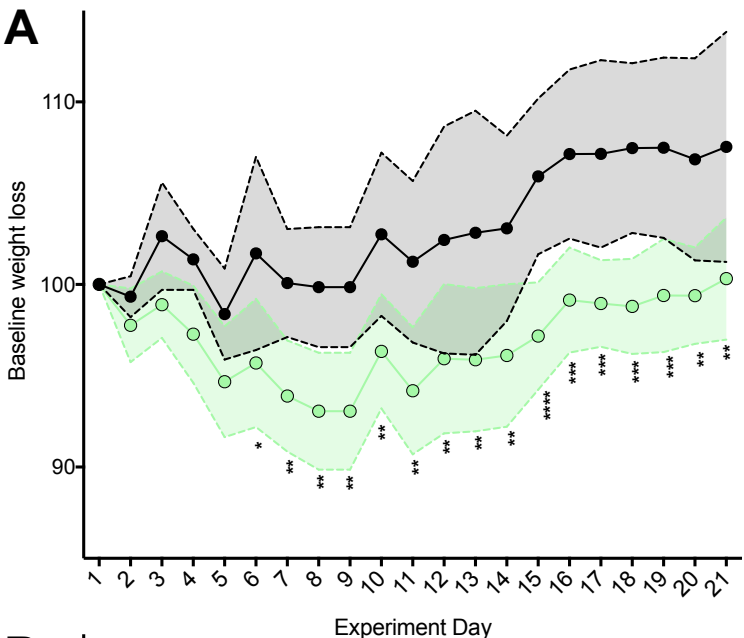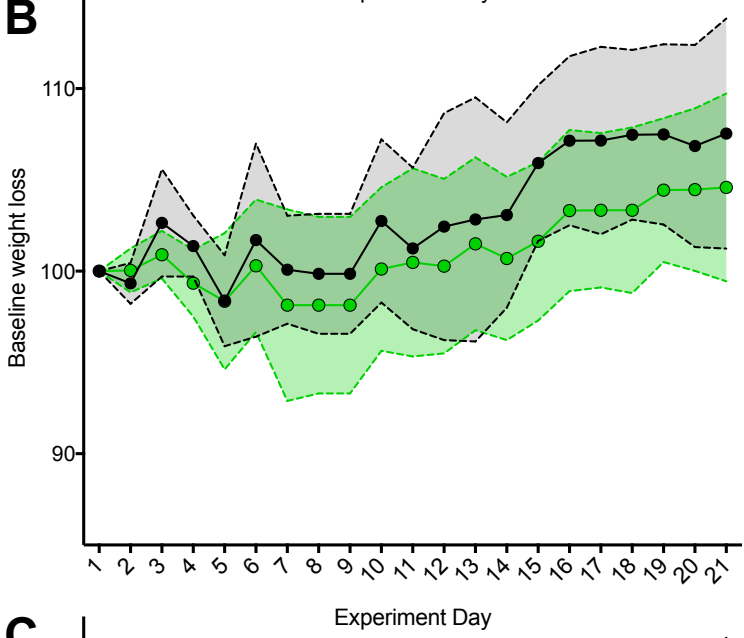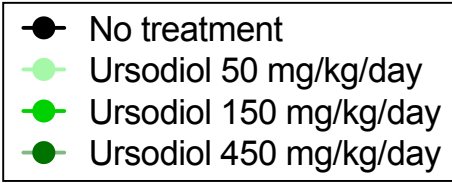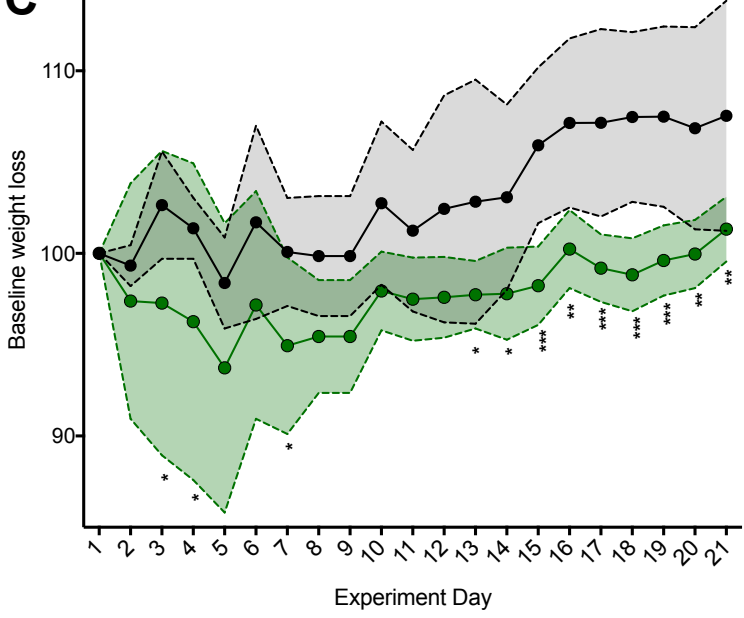

Figure 2

### Ileum

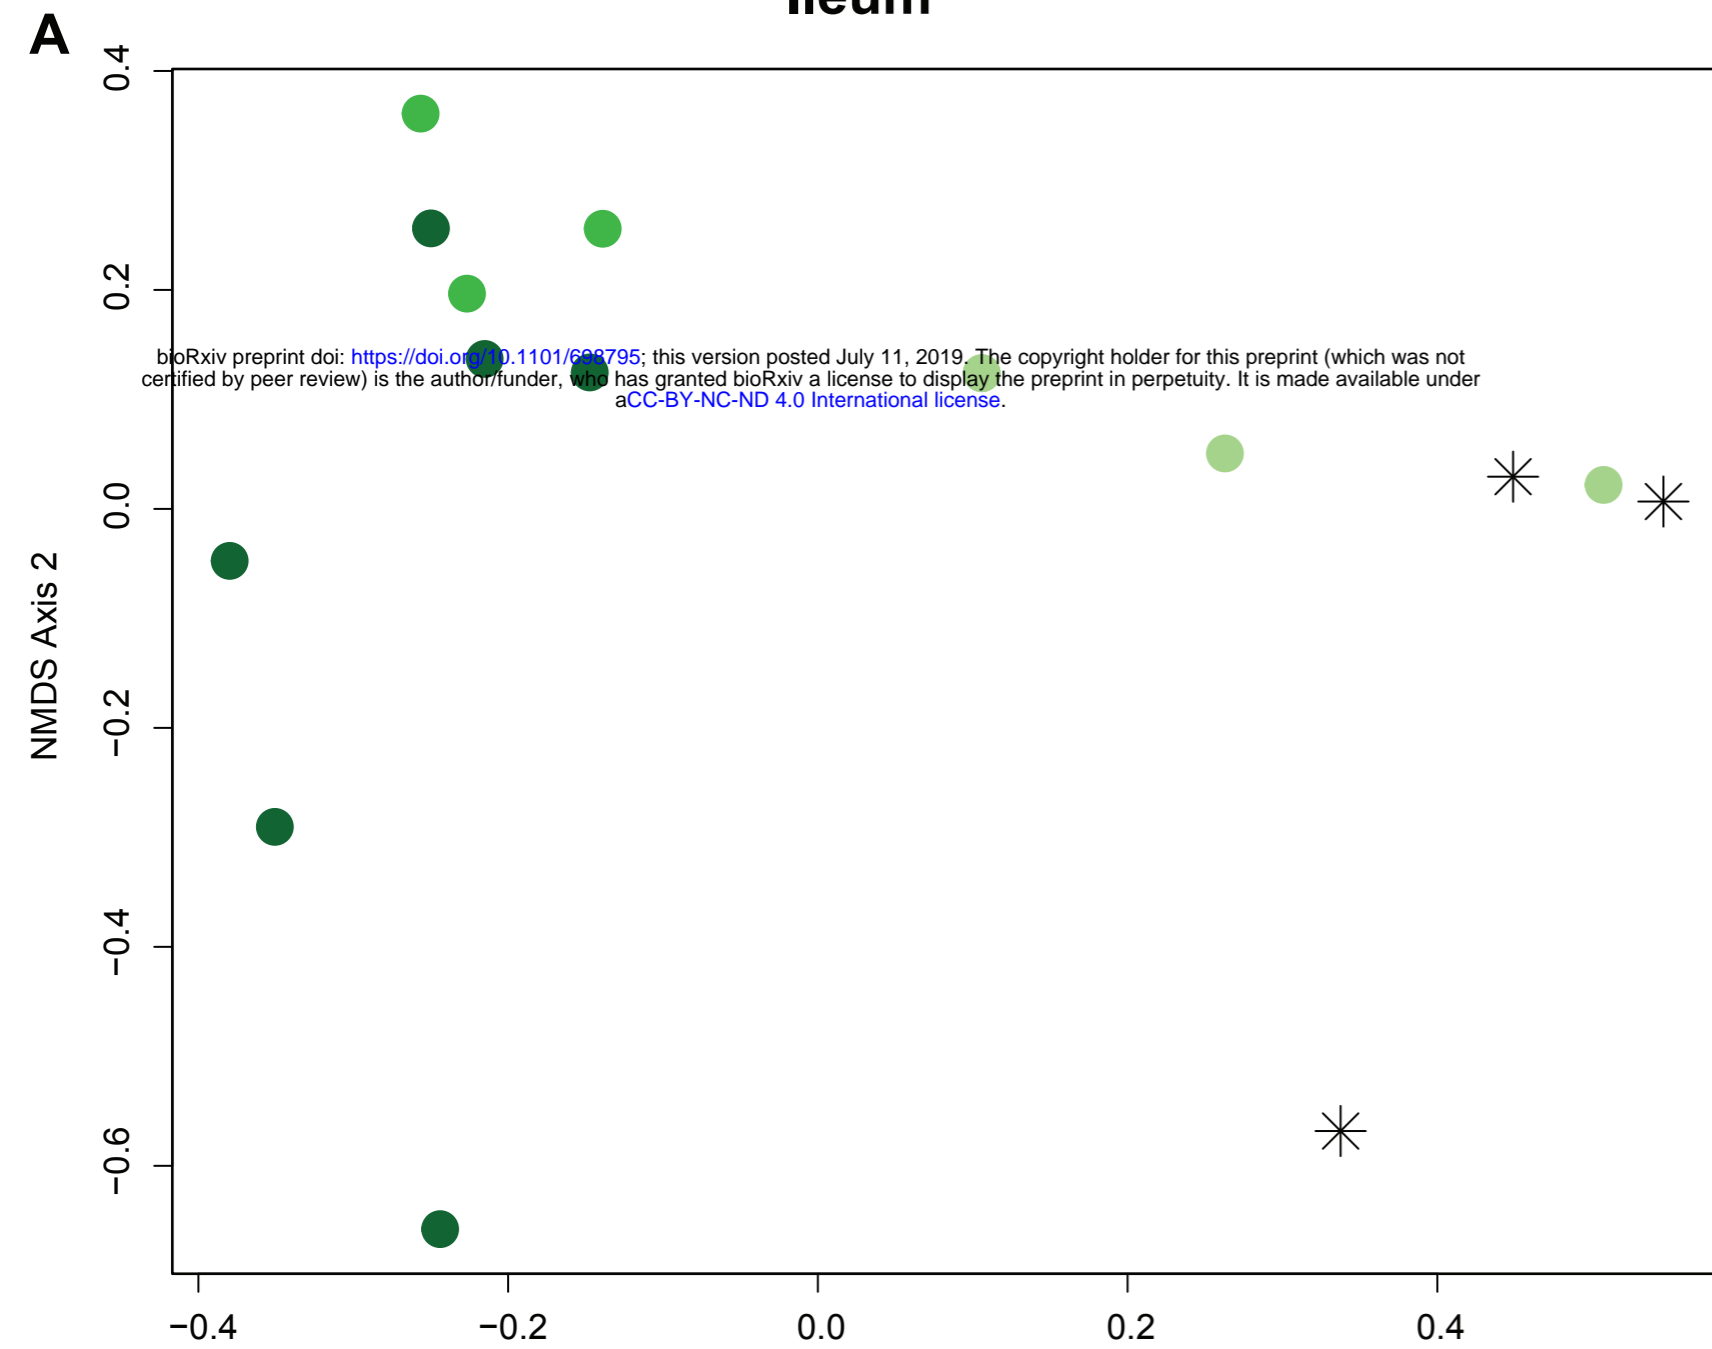

### Cecum

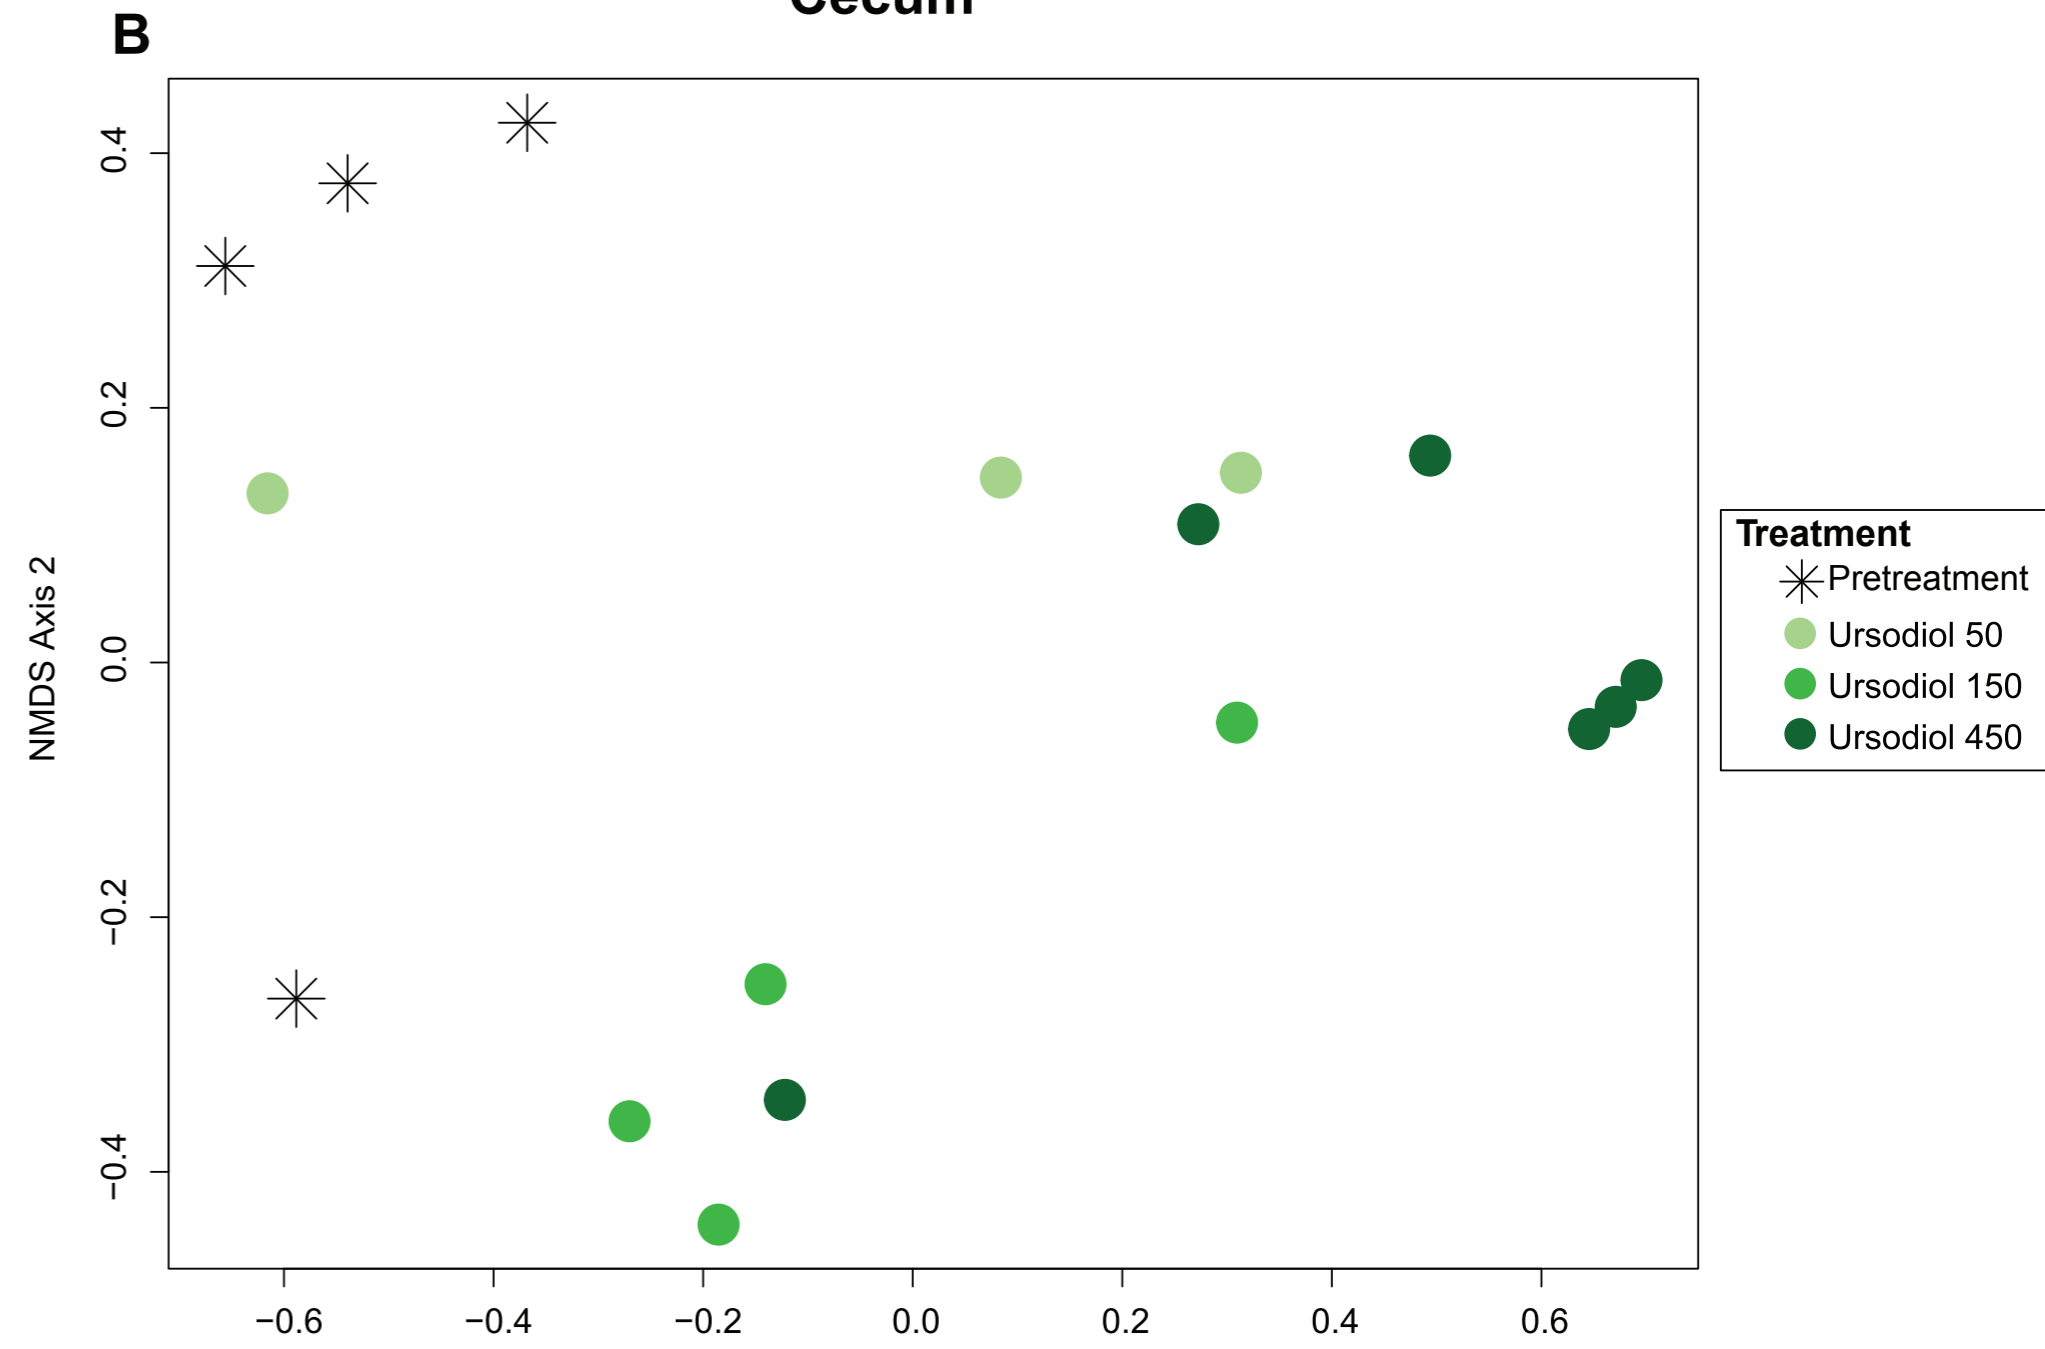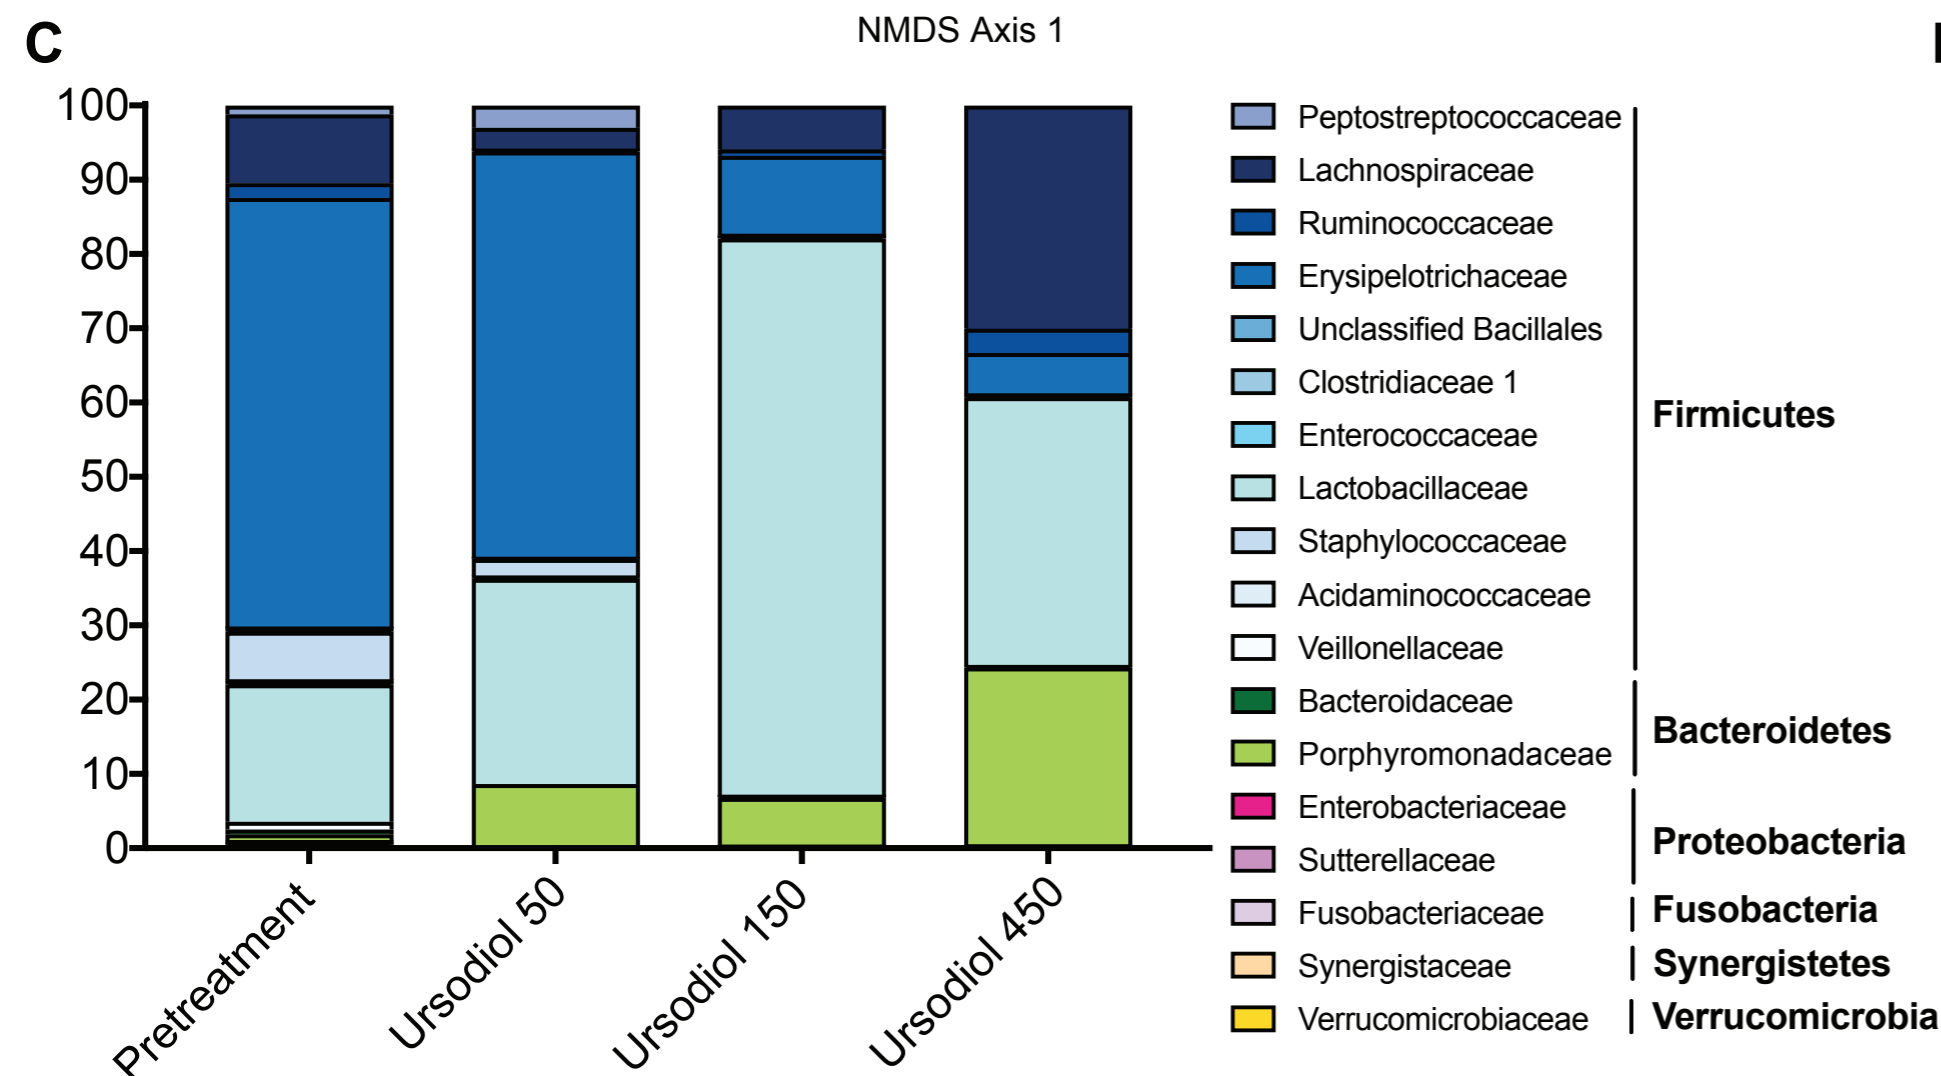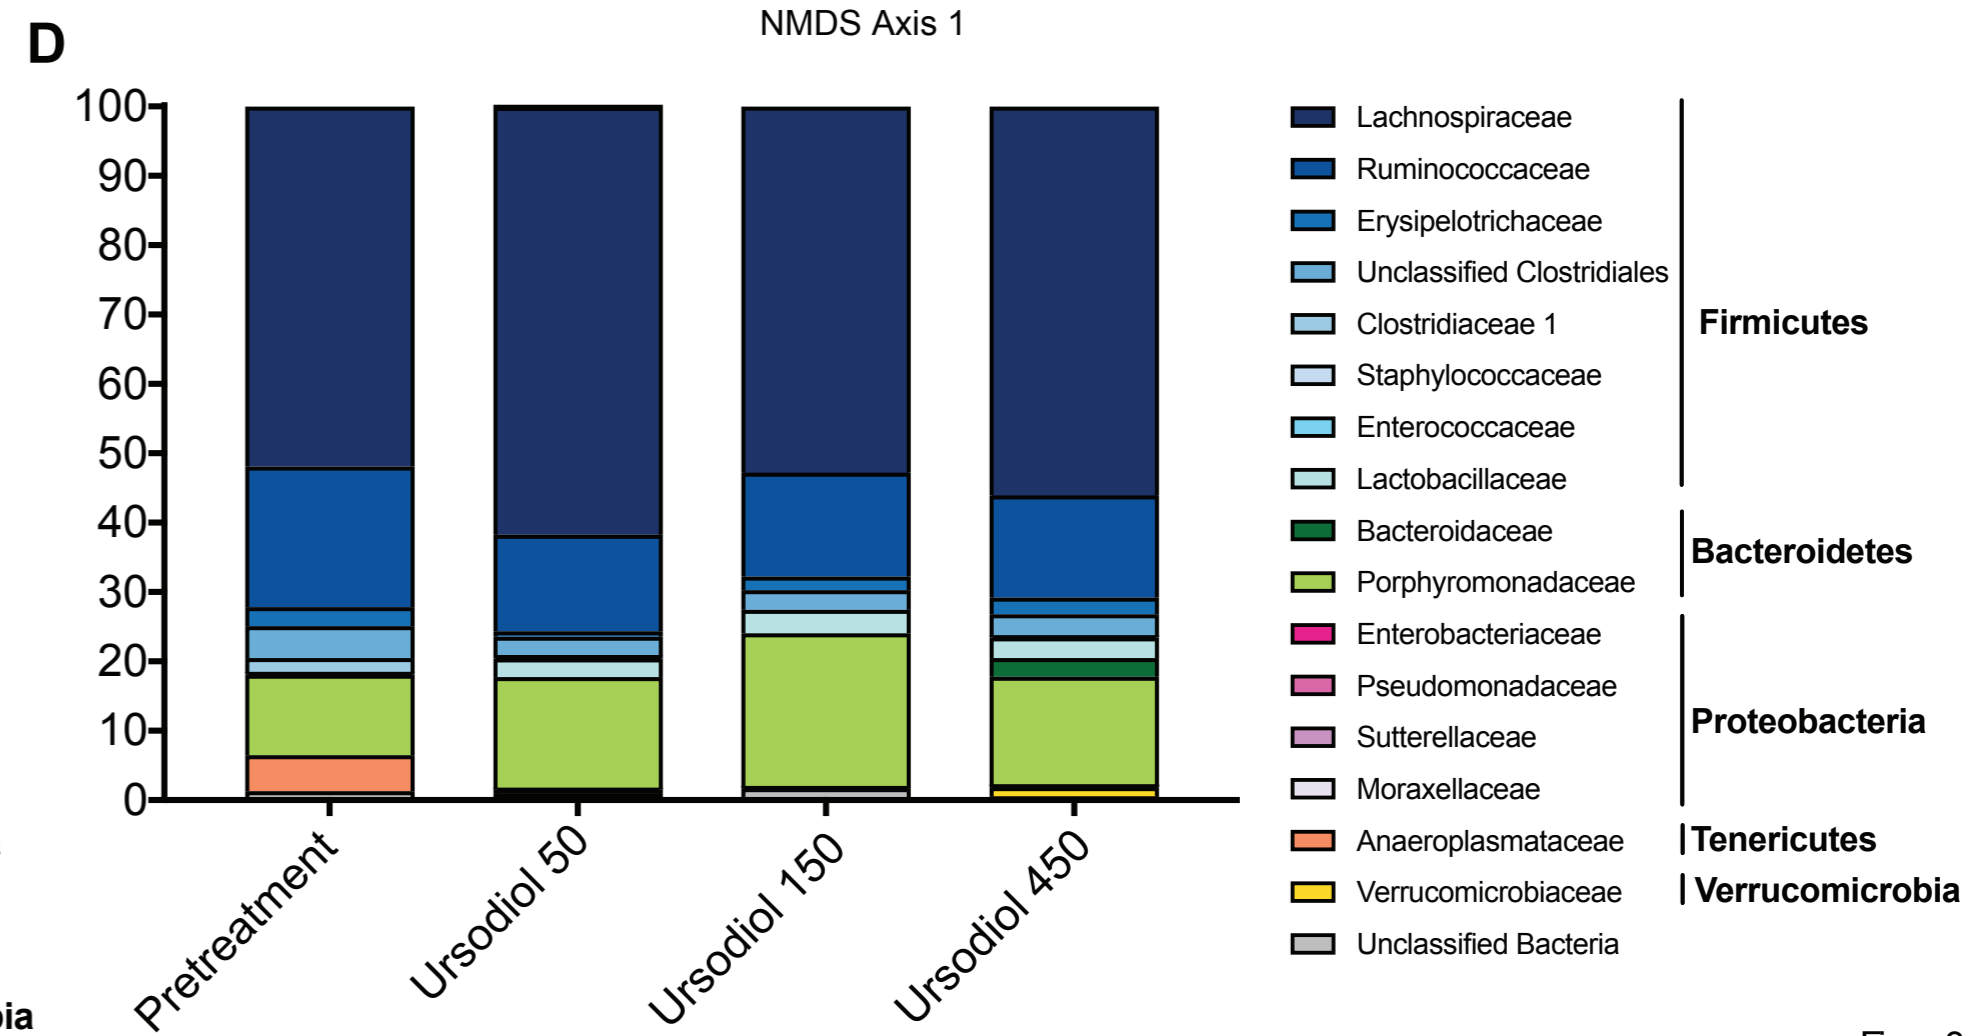

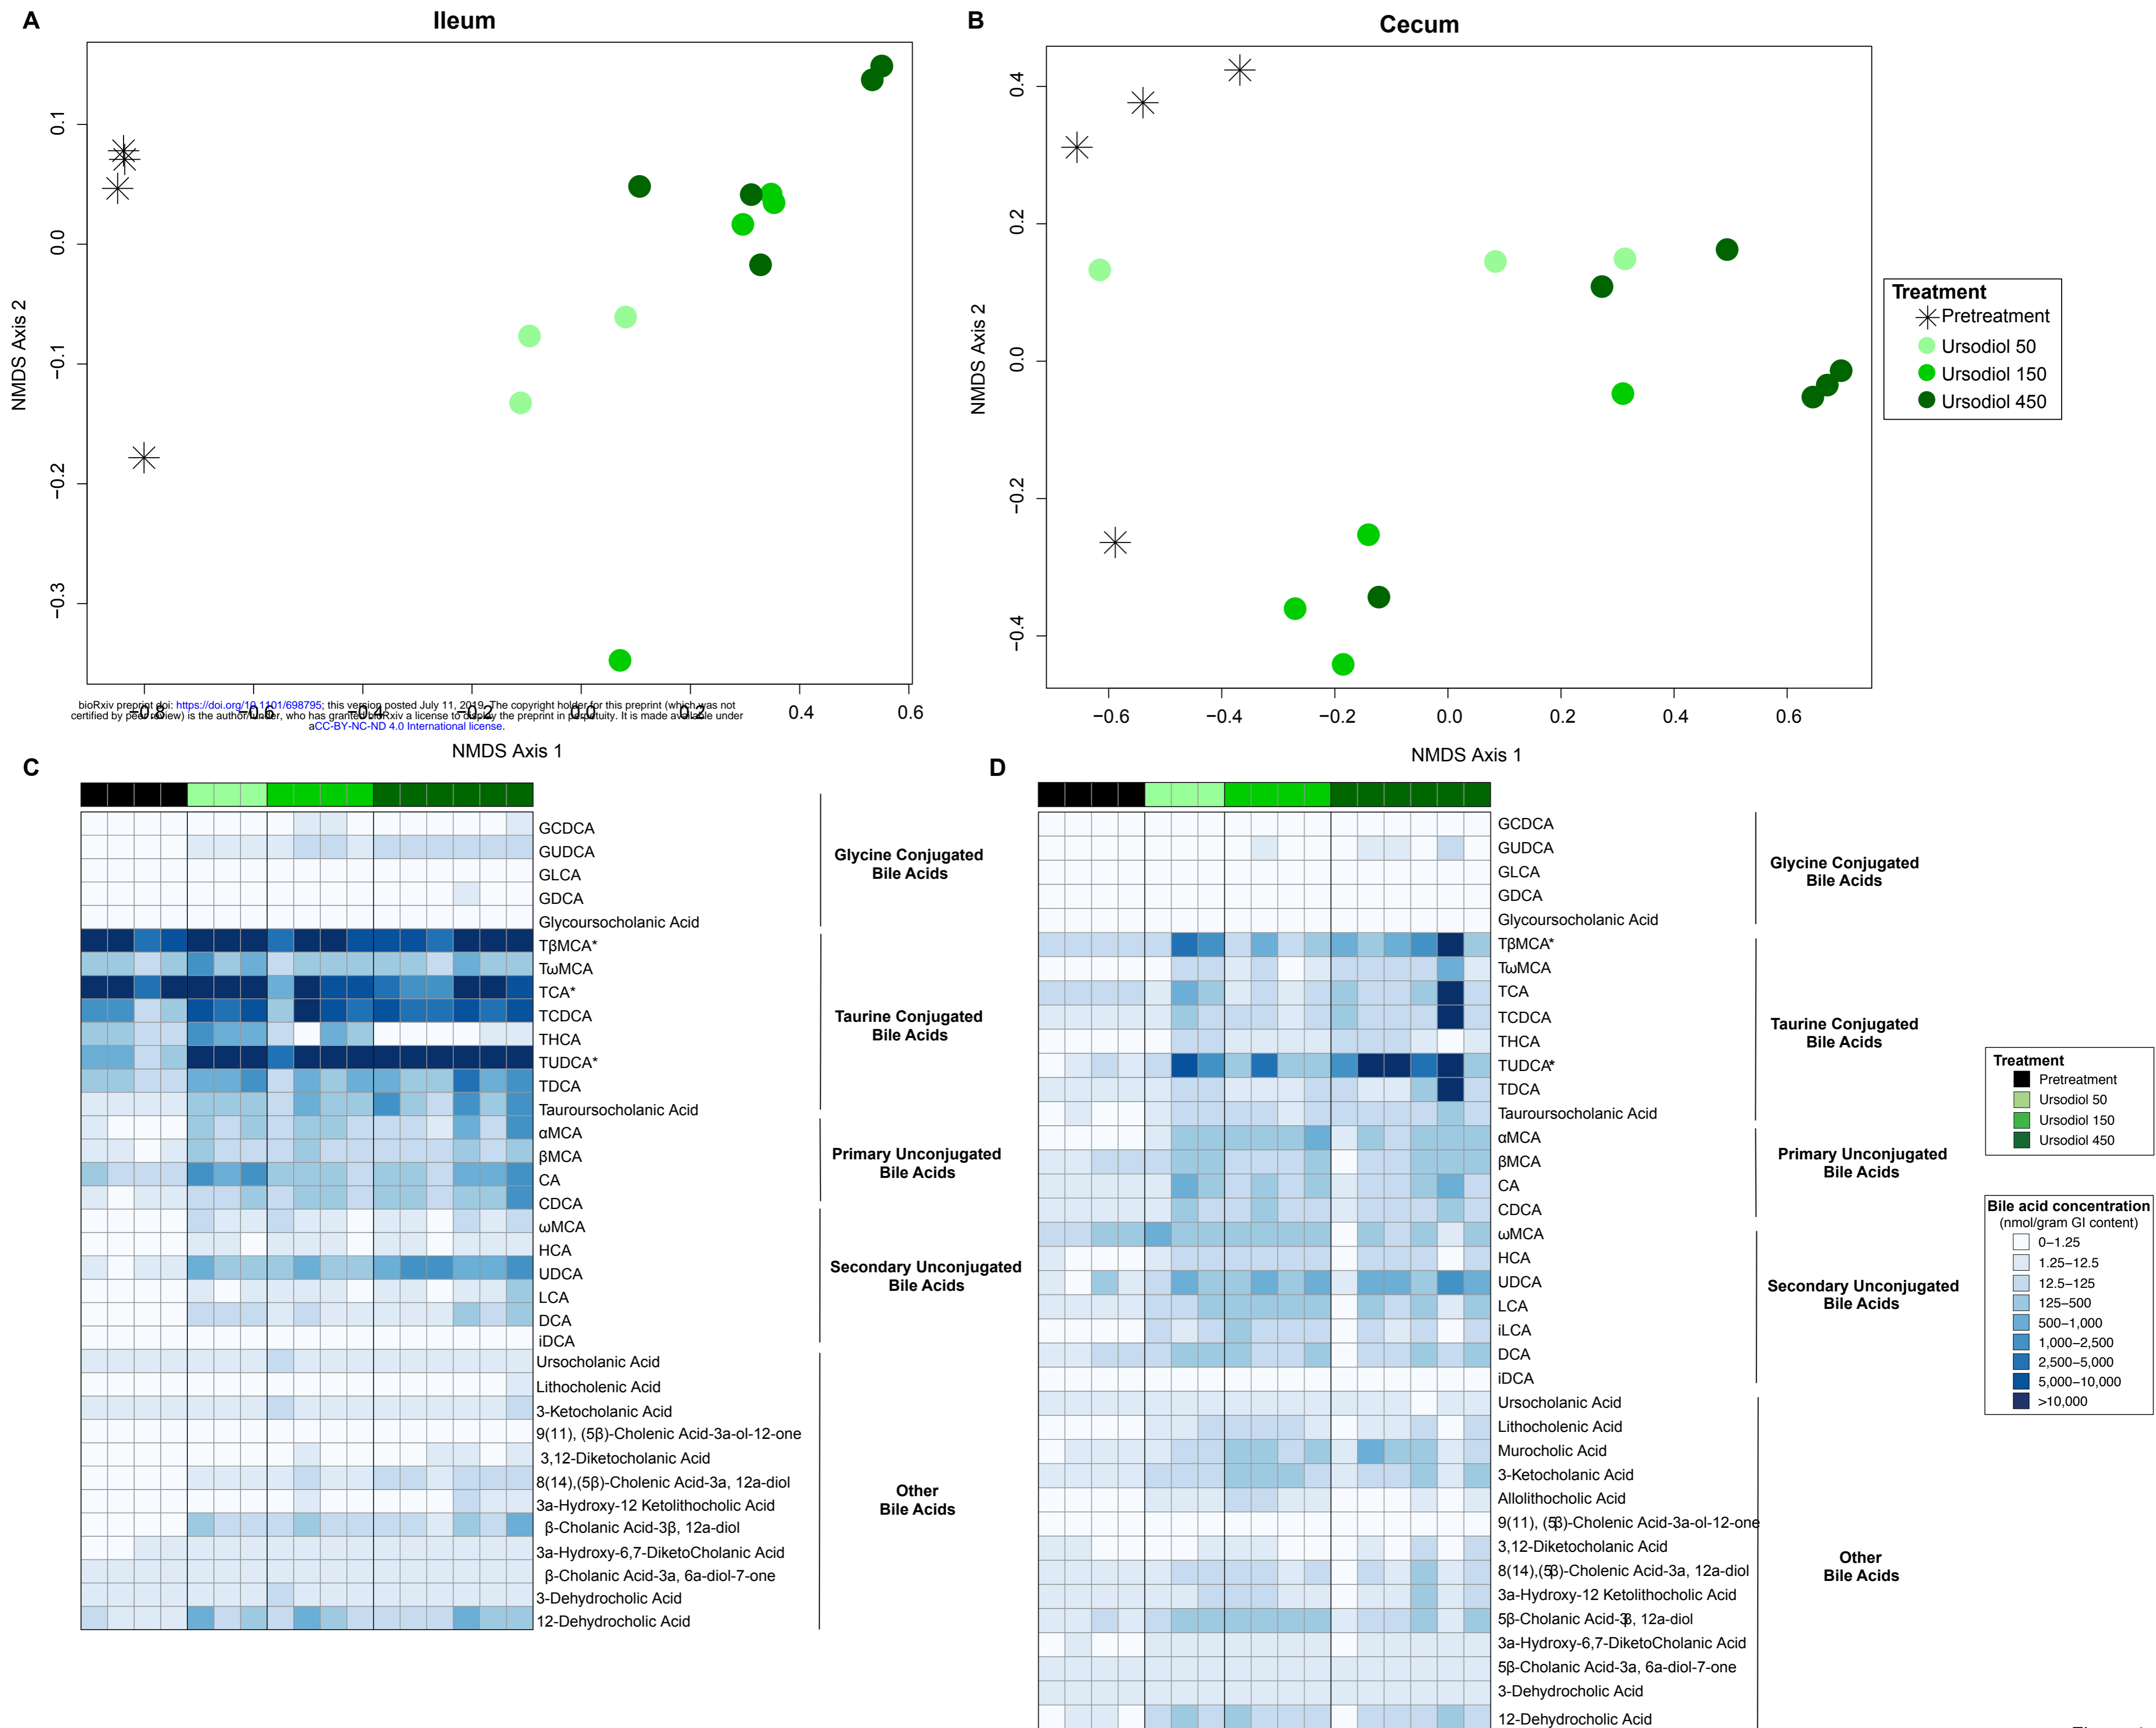

Figure 4

**A**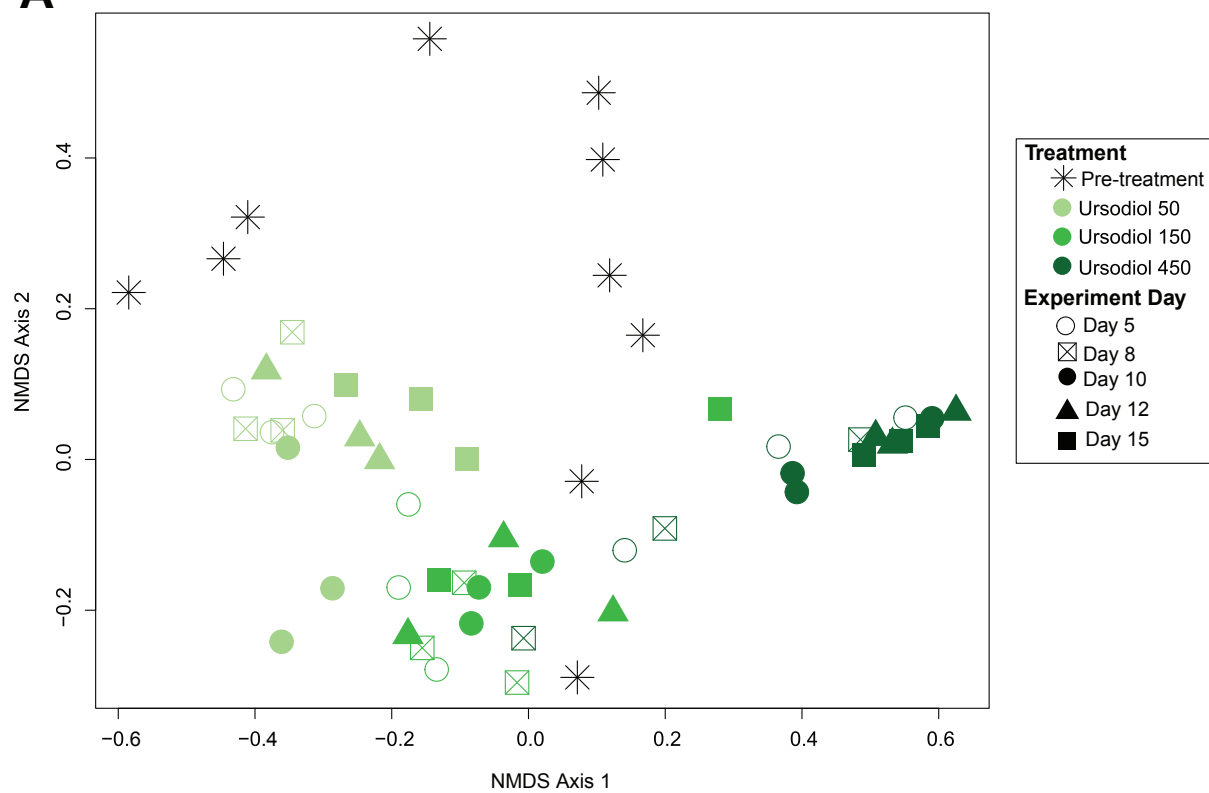**B**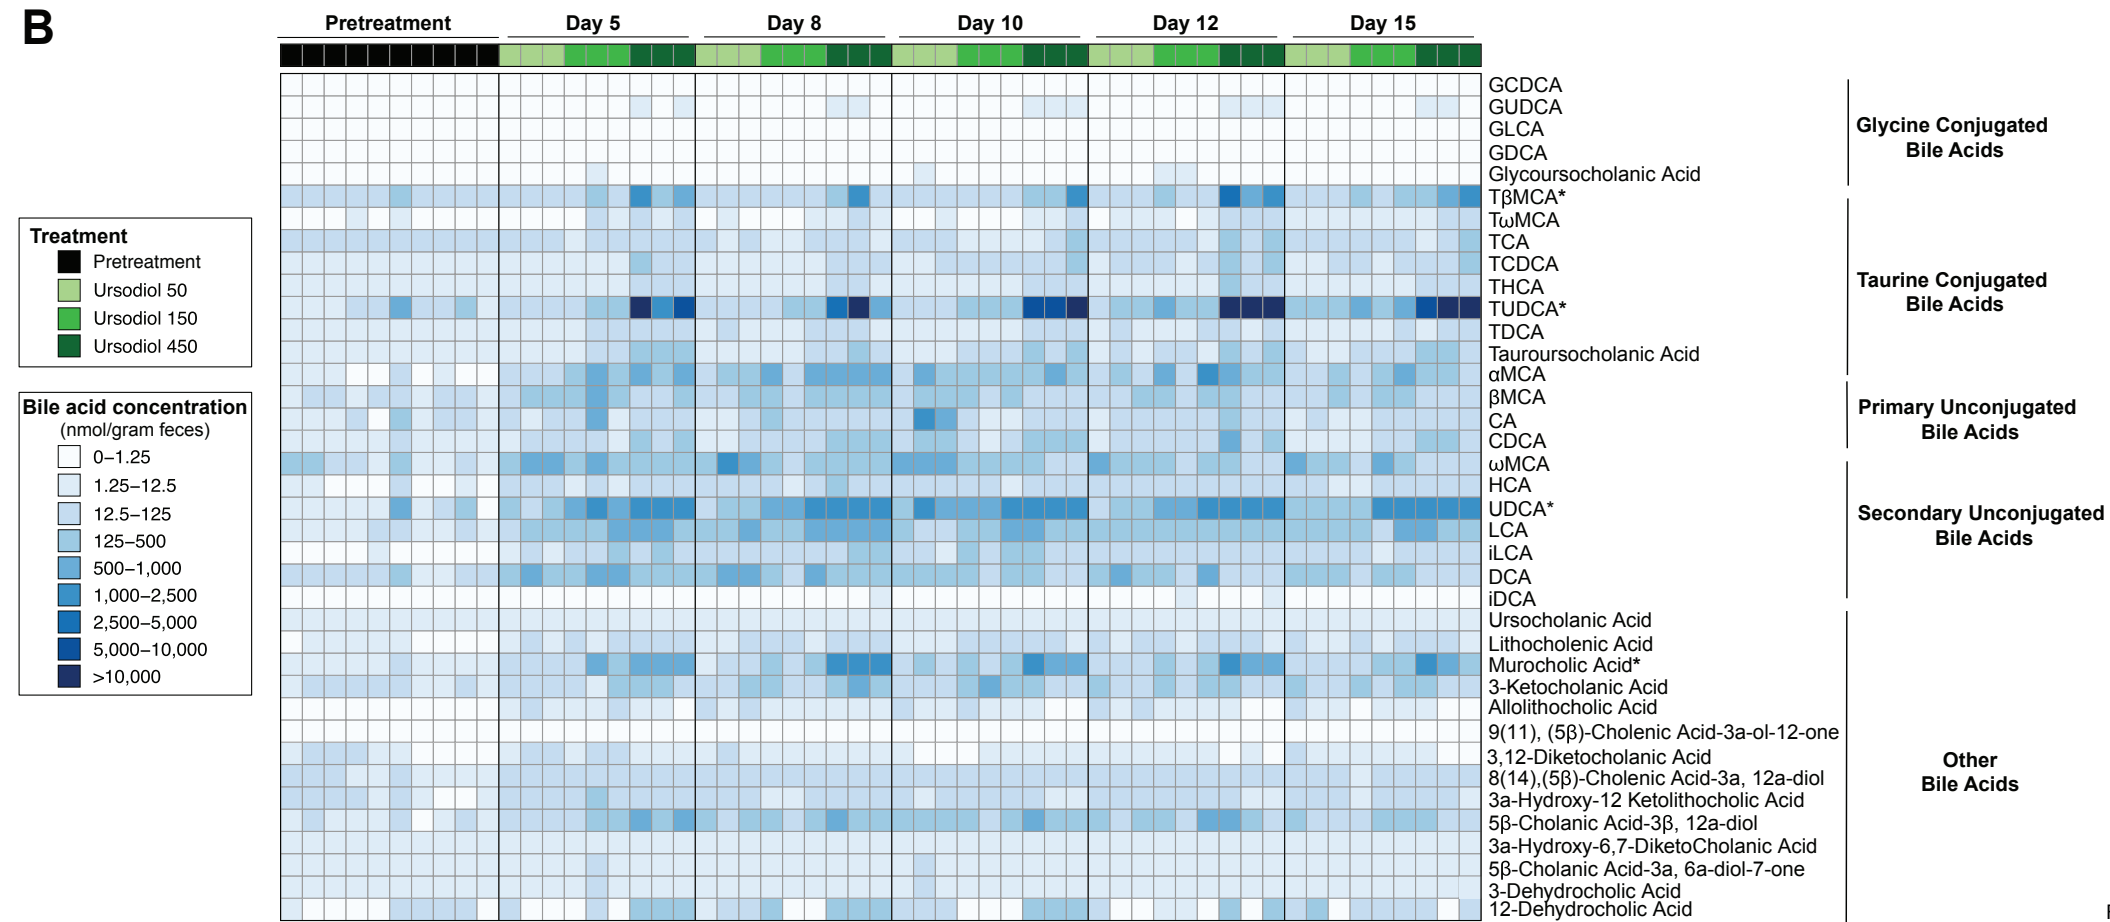

Source: https://www.biorxiv.org/content/10.1101/698795v1.full.pdf
